1 **Reevaluation of Piezo1 as a gut RNA sensor**

2

3 **Nickolls AR<sup>1</sup>, O'Brien GS<sup>1</sup>, Shnyder S<sup>1</sup>, Zhang Y<sup>2</sup>, Nagel M<sup>1</sup>, Patapoutian A<sup>2</sup>,**  
4 **Chesler AT<sup>1,\*</sup>**

5

6 **<sup>1</sup>National Center for Complementary and Integrative Health, National Institutes of**  
7 **Health, Bethesda, MD, USA**

8 **<sup>2</sup>Howard Hughes Medical Institute, Department of Neuroscience, Dorris**

9 **Neuroscience Center, The Scripps Research Institute, La Jolla, CA, USA**

10

11 **\*For correspondence: [alexander.chesler@nih.gov](mailto:alexander.chesler@nih.gov)**

12

13 **Competing interest:** The authors declare no that no competing interests exist.

14

15 **ABSTRACT**

16

17 Piezo1 is a stretch-gated ion channel required for mechanosensation in many  
18 organ systems. Recent provocative findings describe a new role for Piezo1 in the gut,  
19 suggesting that it is a sensor of microbial single-stranded RNA (ssRNA) rather than  
20 mechanical force. If true, this would redefine the scope of Piezo biology. Here, we  
21 sought to replicate the central finding that fecal ssRNA is a natural agonist of Piezo1.  
22 While we observed that fecal extracts and ssRNA stimulate calcium influx in certain cell  
23 lines, this response was independent of Piezo1. Additionally, sterilized dietary extracts  
24 devoid of gut biome RNA showed similar cell line-specific stimulatory activity to fecal  
25 extracts. Together, our data highlight potential confounds inherent to gut-derived  
26 extracts, exclude Piezo1 as a receptor for ssRNA in the gut, and support a dedicated  
27 role for Piezo channels in mechanosensing.

## 28 INTRODUCTION

29

30 Piezo proteins are mechanically gated ion channels that transduce changes in  
31 plasma membrane tension into electrical current (Ridone et al., 2019; Szczot et al.,  
32 2021). There are two members in the mammalian Piezo family: Piezo1 and Piezo2  
33 (Coste et al., 2010). Piezo1 is expressed in many tissues including the cardiovascular,  
34 hematopoietic, and skeletal systems (Jiang et al., 2021; Li et al., 2014; Retailleau et al.,  
35 2015; Rode et al., 2017; Sun et al., 2019; Wang et al., 2016). Specifically, Piezo1  
36 mediates the mechanical sensing of fluid flow and is required for normal development  
37 and function of lymph and blood vessels (Li et al., 2014; Liu et al., 2020; Nonomura et  
38 al., 2018; Ranade et al., 2014b). Additionally, many blood cell types depend on Piezo1  
39 for shear force sensing and volume regulation (Cahalan et al., 2015; Cinar et al., 2015;  
40 Faucherre et al., 2014; Solis et al., 2019). These vascular functions are particularly  
41 evident in the clinical manifestation of Piezo1 mutations in humans (Albuisson et al.,  
42 2013; Bae et al., 2013; Fotiou et al., 2015; Glogowska et al., 2017; Lukacs et al., 2015).  
43 Piezo1 also regulates the formation and maintenance of bone and cartilage through  
44 mechanical load sensing (Hendrickx et al., 2021; Lee et al., 2014; Li et al., 2019; Sun et  
45 al., 2019; Wang et al., 2020; Zhou et al., 2020). In other organ systems, the role of  
46 Piezo1 is currently less well-defined, but it is known to function as a mechanosensor in  
47 neural stem cells and certain epithelial and mesenchymal cell types (Eisenhoffer et al.,  
48 2012; Martins et al., 2016; Miyamoto et al., 2014; Pathak et al., 2014; Sugimoto et al.,  
49 2017). By contrast, the homologous Piezo2 is expressed at its highest levels in the  
50 somatosensory system, vagal-nodose complex, and specialized epithelial cells (Chiu et

51 al., 2014; Kupari et al., 2019; Nguyen et al., 2017; Usoskin et al., 2015; Wang et al.,  
52 2017; Woo et al., 2014). Piezo2 is responsible for detecting gentle touch, vibration, and  
53 proprioception in mice and humans (Chesler et al., 2016; Ranade et al., 2014a; Woo et  
54 al., 2015).

55 Many extrinsic factors can influence Piezo mechanosensitivity including  
56 membrane tension, membrane voltage, cytoskeletal integrity, extracellular matrix  
57 contact, cyclic adenosine monophosphate signaling, and phosphatidylinositol second  
58 messenger pathways (Borbiro et al., 2015; Dubin et al., 2012; Gaub and Müller, 2017;  
59 Moroni et al., 2018; Narayanan et al., 2018; Romero et al., 2019, 2020). In addition to  
60 this list, it stands to reason that there could be ligands of Piezo channels that modulate  
61 or even directly evoke channel gating. Indeed, high-throughput drug screens have  
62 generated the synthetic small molecules called Yoda1, Jedi1, and Jedi2, which act as  
63 allosteric modulators of Piezo1 by stabilizing its open conformation (Botello-smith et al.,  
64 2019; Syeda et al., 2015; Wang et al., 2018).

65 Recently, a provocative study provided the first evidence of endogenous ligands  
66 for Piezo channels (Sugisawa et al., 2020). Remarkably, it was shown that Piezo1 in the  
67 mouse gut is not activated by mechanical forces but instead functions as a ligand-gated  
68 ion channel to sense single-stranded RNAs (ssRNAs). It was proposed that bioactive  
69 ssRNAs are produced by the gut microbiome, and that these molecules function  
70 through Piezo1 channels to alter serotonin production and trigger a physiological  
71 cascade that impacts bone homeostasis. Considering that ssRNAs might be generated  
72 and released under a variety of circumstances, the scientific field will have to radically  
73 rethink the role of Piezo1 not only in the gut but throughout the body. It also suggests

74 that perhaps Piezo2 can be gated by these types of molecules. Piezo2 is expressed by  
75 sensory and vagal neurons targeting the skin and other organ systems with diverse  
76 microbiomes that are also sites of viral infections and colonization by pathogenic  
77 bacteria or fungi (Chiu et al., 2014; Kupari et al., 2019; Nguyen et al., 2017; Usoskin et  
78 al., 2015; Wang et al., 2017; Woo et al., 2014). Therefore, we set out to use calcium  
79 imaging and electrophysiological recordings to investigate how ssRNAs derived from  
80 the gut influence Piezo channel function.

81

## 82 RESULTS

83

### 84 **ssRNA40 does not alter calcium activity or mechanotransduction in N2a cells**

85 ssRNA40 is a synthetic 20-mer ssRNA oligonucleotide derived from the human  
86 immunodeficiency virus (HIV) genome (Heil et al., 2004). ssRNA40 is classically known  
87 as an agonist for the immune surveillance toll-like receptor 7 and 8 in mice and humans,  
88 respectively (Heil et al., 2004; Zhang et al., 2018). However, it was recently reported  
89 that ssRNA40 also shows agonist activity toward the mechanosensitive ion channel  
90 Piezo1 (Sugisawa et al., 2020). To test this finding, we first used the Neuro-2a (N2a)  
91 mouse neuroblastoma cell line since these cells natively express Piezo1 (Coste et al.,  
92 2010) and were reported to conduct a Piezo1-dependent current in the presence of  
93 ssRNA40 (Sugisawa et al., 2020).

94 For measuring Piezo1 activity during exposure to ssRNA40, we performed *in*  
95 *vitro* fluorescent calcium imaging on N2a cell cultures with the Fluo-4 AM ester dye.  
96 Using ssRNA40 from the same supplier and dosage as prior studies (10 µg/mL)  
97 (Sugisawa et al., 2020), we found that application of ssRNA40 did not elicit a detectable  
98 increase in fluorescence, even when the imaging time frame was extended up to 3  
99 minutes (Figure 1A and Video S1). As a positive control for Piezo1 activation, we used  
100 Yoda1, which is known to induced Piezo1-dependent calcium transients (Syeda et al.,  
101 2015). 30 µM Yoda1 triggered a dramatic calcium influx over the course of ~1 minute in  
102 virtually all N2a cells (Figures 1A – 1C). This was followed by application of ionomycin,  
103 a potent calcium ionophore, as a further positive control to elicit maximal calcium influx  
104 in all cells. For negative controls, we tested the vehicle solution alone to observe

105 mechanosensitive flow responses, and we tested ssRNA41 to examine sequence-  
106 specific effects of ssRNA (Figure 1A). ssRNA41 is the same length and sequence as  
107 ssRNA40, except all uridine residues are substituted with adenosine; unlike ssRNA40,  
108 this molecule is not a TLR7/8 agonist (Heil et al., 2004). After autofluorescence  
109 subtraction, there was no significant difference in N2a cell calcium activity between  
110 these negative controls and ssRNA40 (Figure 1C).

111 In addition to directly activating Piezo1, ssRNA40 was reported to delay the  
112 inactivation of Piezo1 mechanically evoked currents (Sugisawa et al., 2020), similar to  
113 Yoda1 (Syeda et al., 2015). We tested this claim by whole-cell voltage-clamp recordings  
114 of N2a cells during simultaneous mechanical stimulation of the plasma membrane.  
115 Mechanical stimuli were administered with a nanomotor probe to indent the cell surface  
116 in 1  $\mu\text{m}$  increments (Video S2). The stimulation elicited a rapidly inactivating inward  
117 current, which is characteristic to the Piezo family of ion channels (Figure 1D). As  
118 expected, including 30  $\mu\text{M}$  Yoda1 in the external bath solution resulted in a reduced  
119 apparent mechanical activation threshold and a prolonged inactivation phase of the  
120 currents (Figures 1D and 1E). By contrast, 10  $\mu\text{g}/\text{mL}$  ssRNA40 in the bath solution  
121 showed no measurable change from the vehicle control on the amplitude, activation  
122 threshold, or inactivation rate of mechanically evoked currents (Figures 1D and 1E).

123

124

**Figure 1**

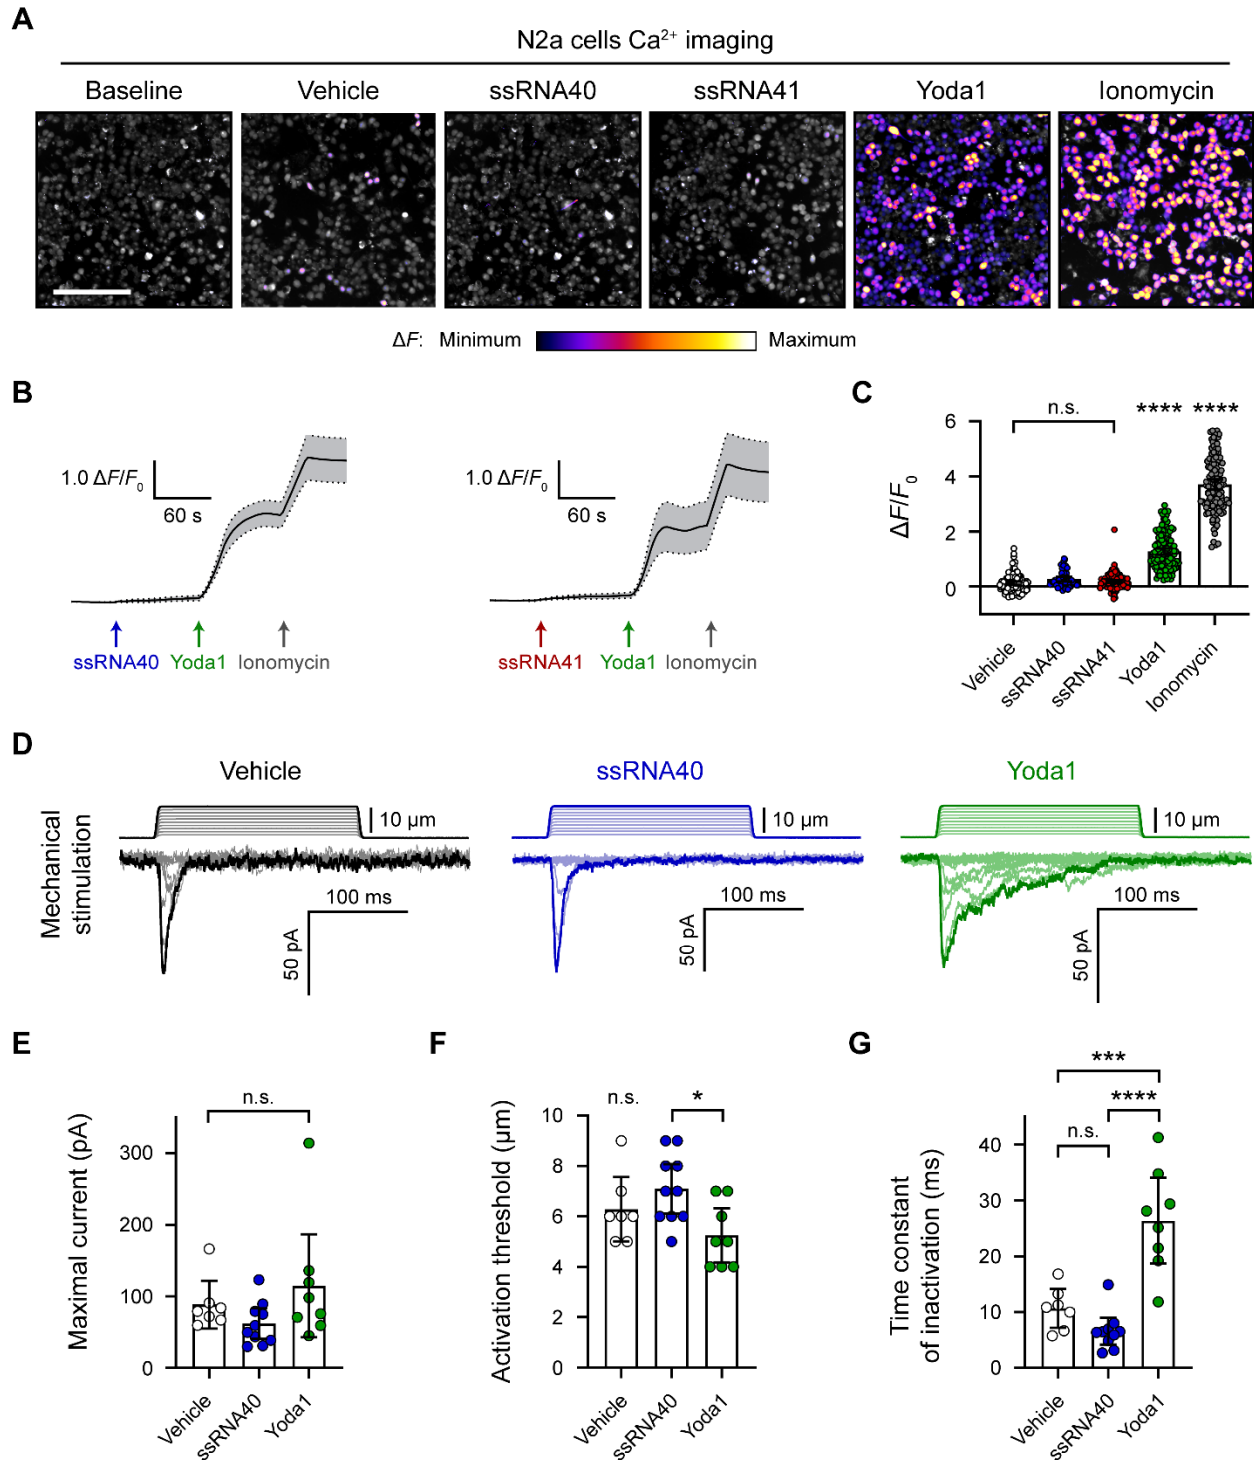

125



126 **Figure 1**

127 **ssRNA40 does not alter calcium activity or mechanotransduction in N2a cells**

128 (A) Fluo-4 calcium imaging of N2a cells during exposure to different treatments, representative of  $\geq 3$   
129 independent recordings for each condition. The magnitude of the change in fluorescence ( $\Delta F$ ) is  
130 represented on a fire color scale and is superimposed on a grayscale baseline fluorescence image. Cells  
131 were exposed to buffer only (vehicle) or 10  $\mu\text{g}/\text{mL}$  ssRNA40 or ssRNA41 for up to 3 minutes, followed by  
132 30  $\mu\text{M}$  Yoda1 and 10  $\mu\text{M}$  ionomycin. Scale bar is 200  $\mu\text{m}$ .

133 (B) Example calcium imaging traces of ssRNA40 and ssRNA41, each followed by Yoda1 and ionomycin  
134 control treatments. Only cells that responded to Yoda1 (functionally expressing Piezo1) were analyzed.  
135 Fluorescence values are shown as  $\Delta F$  normalized to the initial fluorescence ( $\Delta F/F_0$ ).  $n = 50$  cells plotted  
136 as mean  $\pm$  95% confidence interval (CI).

137 (C) Quantification of calcium responses to different treatments.  $n = 50$  cells per condition. Error bars  
138 indicate mean  $\pm$  95% CI. One-way ANOVA with Bonferroni correction: not significant (n.s.)  $p \geq 0.05$ , \*\*\*\*  $p$   
139  $< 0.0001$ .

140 (D) Example whole-cell voltage-clamp recordings of N2a cells during mechanical stimulation. Top traces  
141 indicate the magnitude of plasma membrane indentation in 1  $\mu\text{m}$  steps, and bottom traces show whole-  
142 cell currents elicited by the stimuli. Vehicle, 10  $\mu\text{g}/\text{mL}$  ssRNA40, or 30  $\mu\text{M}$  Yoda1 were bath-applied 10  
143 minutes prior to recording.

144 (E – G) Quantification of mechanically evoked current amplitude, threshold, and inactivation.  $n = 7 - 10$   
145 cells per condition. Error bars represent mean  $\pm$  95% CI. One-way ANOVA with Bonferroni correction: n.s.  
146  $p \geq 0.05$ , \*  $p < 0.05$ , \*\*\*  $p < 0.001$ , \*\*\*\*  $p < 0.0001$ .

147

148 **ssRNA40 does not activate *Piezo1*-transfected HEK293 cells**

149           Compared to the *Piezo1* agonist activity of Yoda1, ssRNA40 was reported to  
150 have a relatively small effect size (Sugisawa et al., 2020). We were concerned that such  
151 a small effect size could have been overlooked in our initial experiments, given the  
152 relatively low functional expression of *Piezo1* in N2a cells. Therefore, we also examined  
153 the effects of ssRNA on *Piezo1* channels expressed at high levels via transient  
154 transfection of human embryonic kidney 293 (HEK293) cells. We performed calcium  
155 imaging to compare the responses of native versus *Piezo1*-transfected HEK293 cells  
156 during exposure to vehicle, ssRNA40, or ssRNA41 (Figures 2A and 2B). Each imaging  
157 trial was followed by stimulation with Yoda1 and ionomycin as positive controls for  
158 *Piezo1* response and maximal response, respectively. There was a noticeable but  
159 nonsignificant calcium response of untransfected cells to Yoda1 (Figure 2C), consistent  
160 with a previous report that HEK293 cells express very low but detectable levels of  
161 human *Piezo1* (Dubin et al., 2017). However, in both untransfected and *Piezo1*-  
162 transfected conditions, we found no significant calcium activity between vehicle,  
163 ssRNA40, and ssRNA41 (Figure 2C).

164           Prior studies used between 5 and 20  $\mu\text{g}/\text{mL}$  ssRNA40 in their experiments (Heil  
165 et al., 2004; Lehmann et al., 2012; Shibata et al., 2016; Sugisawa et al., 2020). For that  
166 reason, our above experiments used 10  $\mu\text{g}/\text{mL}$  ssRNA40. However, to explore whether  
167 ssRNA40 has a dose-response effect on *Piezo1*, we performed calcium imaging on  
168 *Piezo1*-transfected HEK293 cells during exposure to different concentrations of  
169 ssRNA40. Using a log scale range from 0.05 to 50  $\mu\text{g}/\text{mL}$ , we did not observe significant  
170 calcium influx triggered by ssRNA40 at any concentration (Figure 2D).

**Figure 2**

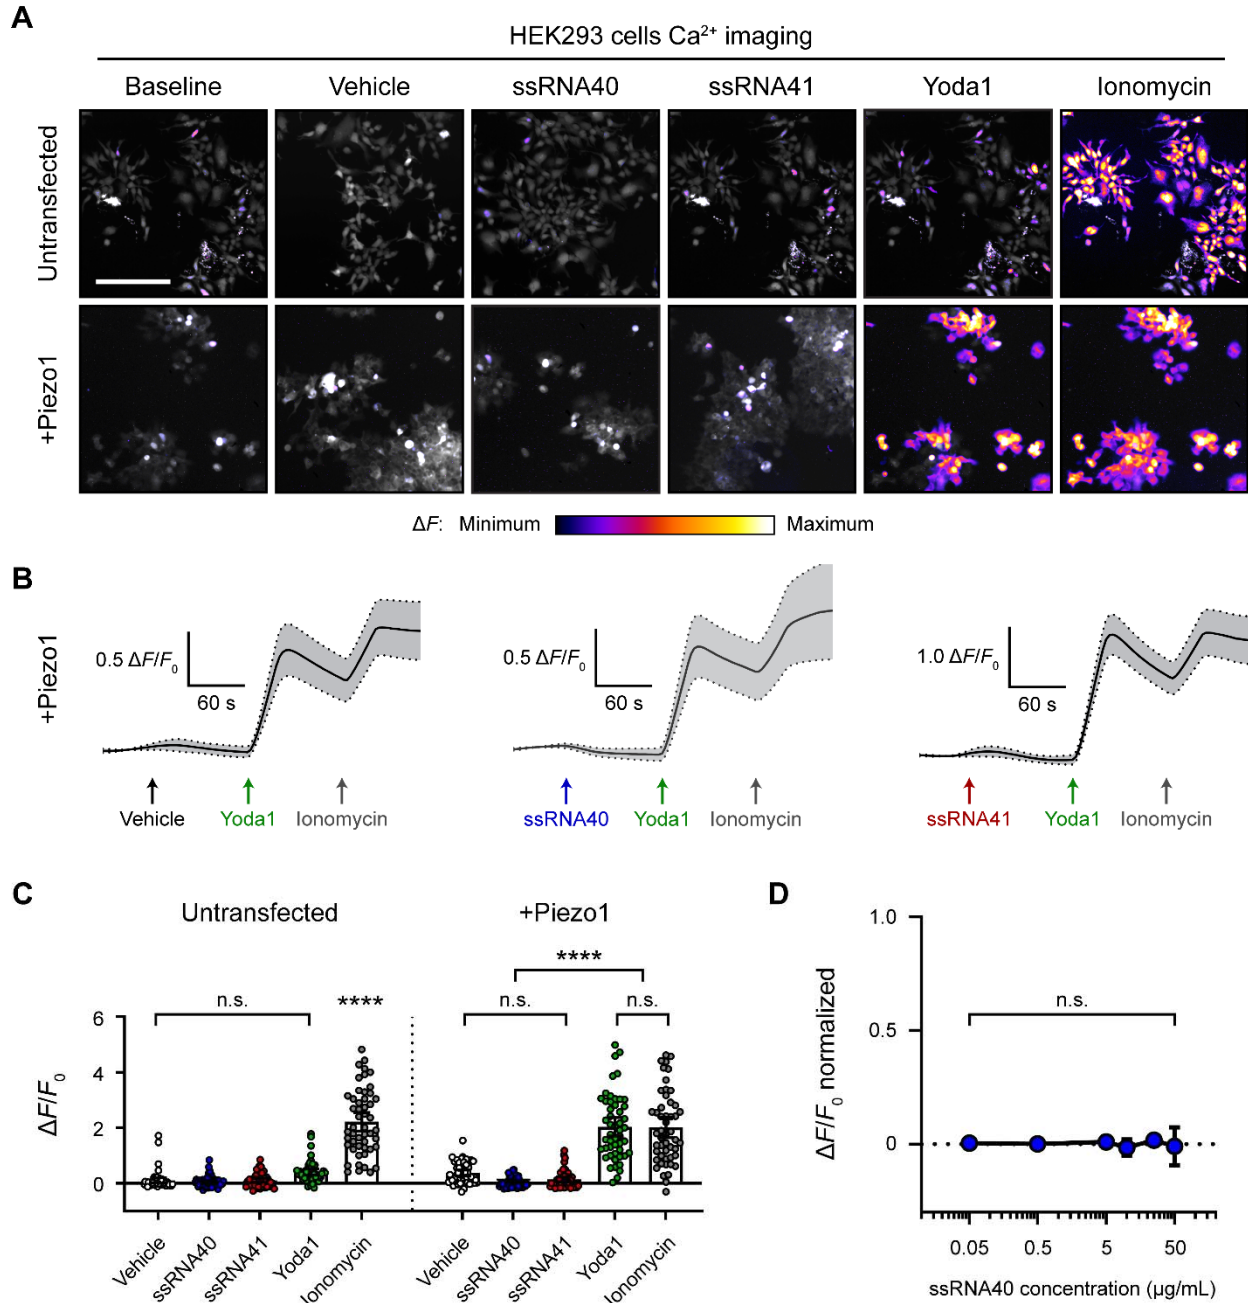

171

172

173 **Figure 2**

174 **ssRNA40 does not activate *Piezo1*-transfected HEK293 cells**

175 (A) Fluo-4 calcium imaging of HEK293 cells, with or without transfection of mouse *Piezo1*, representative  
176 of  $\geq 3$  independent recordings for each condition. Treatment concentrations are 10  $\mu\text{g}/\text{mL}$  ssRNA40 or  
177 ssRNA41, 30  $\mu\text{M}$  Yoda1, and 10  $\mu\text{M}$  ionomycin. Scale bar is 200  $\mu\text{m}$ .

178 (B) Example calcium imaging traces of *Piezo1*-transfected HEK293 cells during different treatments.  
179 Yoda1 was applied 90 seconds after any given RNA sample, and only cells that responded to Yoda1  
180 (presumably *Piezo1*-transfected) were analyzed. Transfection efficiency was generally  $> 60\%$  of the cell  
181 culture.  $n = 50$  cells plotted as mean  $\pm$  95% CI.

182 (C) Quantification of HEK293 cell calcium responses.  $n = 50$  cells per condition plotted as mean  $\pm$  95%  
183 CI. One-way ANOVA with Bonferroni correction: n.s.  $p \geq 0.05$ , \*\*\*\*  $p < 0.0001$ .

184 (D) Dose-response curve of ssRNA40 treatment on *Piezo1*-transfected GCaMP6s-expressing HEK293  
185 cells. After 1 minute of baseline measurement, ssRNA40 was administered for 3 minutes followed by  
186 ionomycin for 1 minute. A random selection of cells was analyzed from each recording. The responses  
187 are normalized, with the ionomycin response being  $\Delta F/F_0 = 1$ .  $n = 25$  cells per dose plotted as mean  $\pm$   
188 95% CI. One-way ANOVA with Bonferroni correction: n.s.  $p \geq 0.05$ .

189 See also Figure S1.

190

191 An inability to replicate a finding could reflect unappreciated nuances in how two  
192 groups conduct the experiments. To address this possibility, we tested if ssRNA40  
193 could activate Piezo1 in a completely independent laboratory using a distinct cell line, a  
194 different methodology, and separately sourced reagents. For these studies, we used a  
195 Piezo1-knockout (Piezo1-KO) genetic background HEK293 cell line (Dubin et al., 2017).  
196 Importantly, this is the identical cell line used in the originally published ssRNA  
197 experiments on Piezo1 (Sugisawa et al., 2020). We recorded the calcium response to  
198 ssRNA40 with or without *Piezo1* transfection using a fluorescence imaging plate reader  
199 (FLIPR) calcium flux screening platform. Several ssRNA40 concentrations were tested  
200 from 0.312 to 5  $\mu\text{g}/\text{mL}$  followed by Yoda1 as a positive control. We compared  
201 untransfected cells to cells transfected with either mouse *Piezo1* or human *Piezo1*  
202 (Figure S1A. No increase in calcium was detected throughout exposure to ssRNA40,  
203 and there were no significant differences between transfected and untransfected cells or  
204 across the various ssRNA40 concentrations (Figure S2A). To examine if ssRNA40  
205 might more subtly potentiate Piezo1 activity, we checked whether the response to 5  $\mu\text{M}$   
206 Yoda1 was increased after exposure to ssRNA40. However, we found no change in the  
207 Yoda1 response following treatment with vehicle or different ssRNA40 concentrations  
208 (Figure S2A). Together, these data independently corroborate our previous  
209 observations that ssRNA40 does not activate Piezo1 directly or modulate its  
210 mechanotransduction in either N2a cells or HEK293 cells.

211

## Figure S1

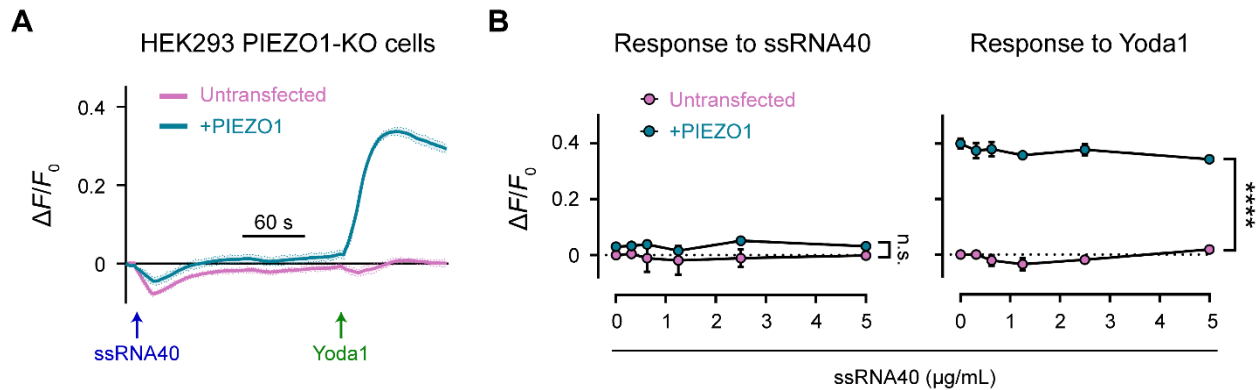

212

213

### 214 Figure S1, related to Figure 2

#### 215 ssRNA40 does not activate Piezo1 or modify its response to Yoda1

216 (A) FLIPR assay on HEK293 Piezo1-KO cells, with or without transfection of human *Piezo1*. Treatment  
217 concentrations are 5  $\mu\text{g/mL}$  ssRNA40 and 5  $\mu\text{M}$  Yoda1.  $n = 4$  wells per condition plotted as mean  $\pm$   
218 standard error of the mean (SEM).

219 (B) Quantification of FLIPR calcium recordings of ssRNA40 dose-response and its effect on Yoda1  
220 response.  $n = 4$  wells per condition plotted as mean  $\pm$  SEM. Pairwise comparisons between untransfected  
221 and transfected recordings using multiple unpaired t-tests with 5% false discovery rate: n.s.  $q \geq 0.05$ , \*\*\*\*  
222  $q < 0.0001$ .

223

## 224 **Fecal and dietary extracts activate HEK293 cells independently of Piezo1**

225       The concept that ssRNA can activate Piezo1 originally arose from screening  
226 components of mouse feces and led to the hypothesis that compounds produced by the  
227 gut microbiome directly influence Piezo1 function. It was reported that both crude fecal  
228 extracts and purified fecal RNA elicit a calcium influx in *Piezo1*-transfected HEK293  
229 cells (Sugisawa et al., 2020). Although the synthetic ssRNA40 molecule did not activate  
230 Piezo1 in our hands, it remained possible that fecal preparations could show agonist  
231 activity. We homogenized and diluted mouse fecal matter to 100 mg/mL and filtered it  
232 through a 0.45  $\mu$ m mesh to eliminate any undissolved sample. Pipetting this solution  
233 onto cells resulted in extremely high autofluorescence that precluded calcium imaging.  
234 However, we found that the autofluorescence was mostly eliminated if the feces were  
235 diluted to at least 5 mg/mL – we refer to this diluted filtered sample as “fecal extract”.  
236 Applying fecal extract to *Piezo1*-transfected HEK293 cells triggered a substantial  
237 calcium response (Figure 3A and Video S3). More dilute preparations of extract yielded  
238 little or no calcium influx. Interestingly, across several imaging trials, we noticed that the  
239 response to 5 mg/mL fecal extract was variable; not all cells in the field of view would  
240 necessarily respond, and the response onset was often 30 – 60 seconds after the fecal  
241 extract was first added (Figures 3A and 3B). Notably, however, we also found that  
242 untransfected HEK293 cells had a similar calcium response to fecal extract, suggesting  
243 that fecal extracts may trigger calcium influx via a Piezo1-independent mechanism  
244 (Figures 3A and 3B). This was confirmed by applying fecal extract to Piezo1-KO  
245 HEK293 cells, which still responded despite the complete absence of Piezo1 (Figures  
246 S2A and S2B).

247 Crude fecal extracts are complex biochemical mixtures that include products  
248 from the microbiome. To test the contribution of bacterial RNA in the calcium response  
249 of HEK293 cells to fecal extract, we purified these nucleic acids (Figure 3C) from our  
250 samples and tested if they activated Piezo1. In contrast to the total extract, we did not  
251 observe a detectable calcium influx with 10 µg/mL fecal RNA – the same concentration  
252 used in other studies (Figure 3D) (Sugisawa et al., 2020). We additionally extracted  
253 fecal RNA using the same kit and procedure as prior studies (Sugisawa et al., 2020),  
254 but this sample likewise failed to induce any activity (see Materials and Methods). We  
255 then performed the reciprocal experiment by treating fecal extracts with the ssRNA-  
256 degrading enzyme RNase A. Both RNase-treated and untreated fecal extracts activated  
257 *Piezo1*-transfected HEK293 cells to a similar degree (Figure 3D). Together, these  
258 experiments demonstrate that fecal extracts can stimulate calcium influx in HEK293  
259 cells, but this effect is unlikely to be mediated by RNA and, regardless, the activity does  
260 not depend on Piezo1.

261 To disentangle possible sources of activation in our fecal extracts, we evaluated  
262 whether anything in the mouse diet might stimulate HEK293 cell calcium influx. We  
263 reasoned that separately testing the food input would eliminate host and microbial  
264 factors found in the fecal output. Mouse chow pellets were dissolved and filtered to  
265 prepare a dietary extract by the same method as the previous fecal extracts.  
266 Surprisingly, applying 5 mg/mL dietary extract to HEK293 cells produced a substantial  
267 calcium response (Figure 3E). This activation occurred in both untransfected and  
268 *Piezo1*-transfected cells. Similar to fecal extract, the dietary extract often activated only  
269 a subset of cells (Figure 3E and Video S4). The timing of the response onset was also



270 variable but tended to occur earlier compared to fecal extract (Figure 3F). Dietary  
271 extract also activated Piezo1-KO HEK293 cells, confirming that Piezo1 is dispensable  
272 for the response to the extract (Figures S2A and S2B). To verify that the dietary and  
273 fecal extracts were not activating cells in a nonspecific way by changing the osmolality  
274 or pH, we confirmed that these properties were not substantially altered between control  
275 solutions and the crude extracts (see Materials and Methods). These results suggest  
276 that an element of the mouse diet, if present in fecal matter, could be a confounding  
277 factor when studying active compounds derived from the host gut or resident microbiota  
278 in calcium imaging assays.

**Figure 3**

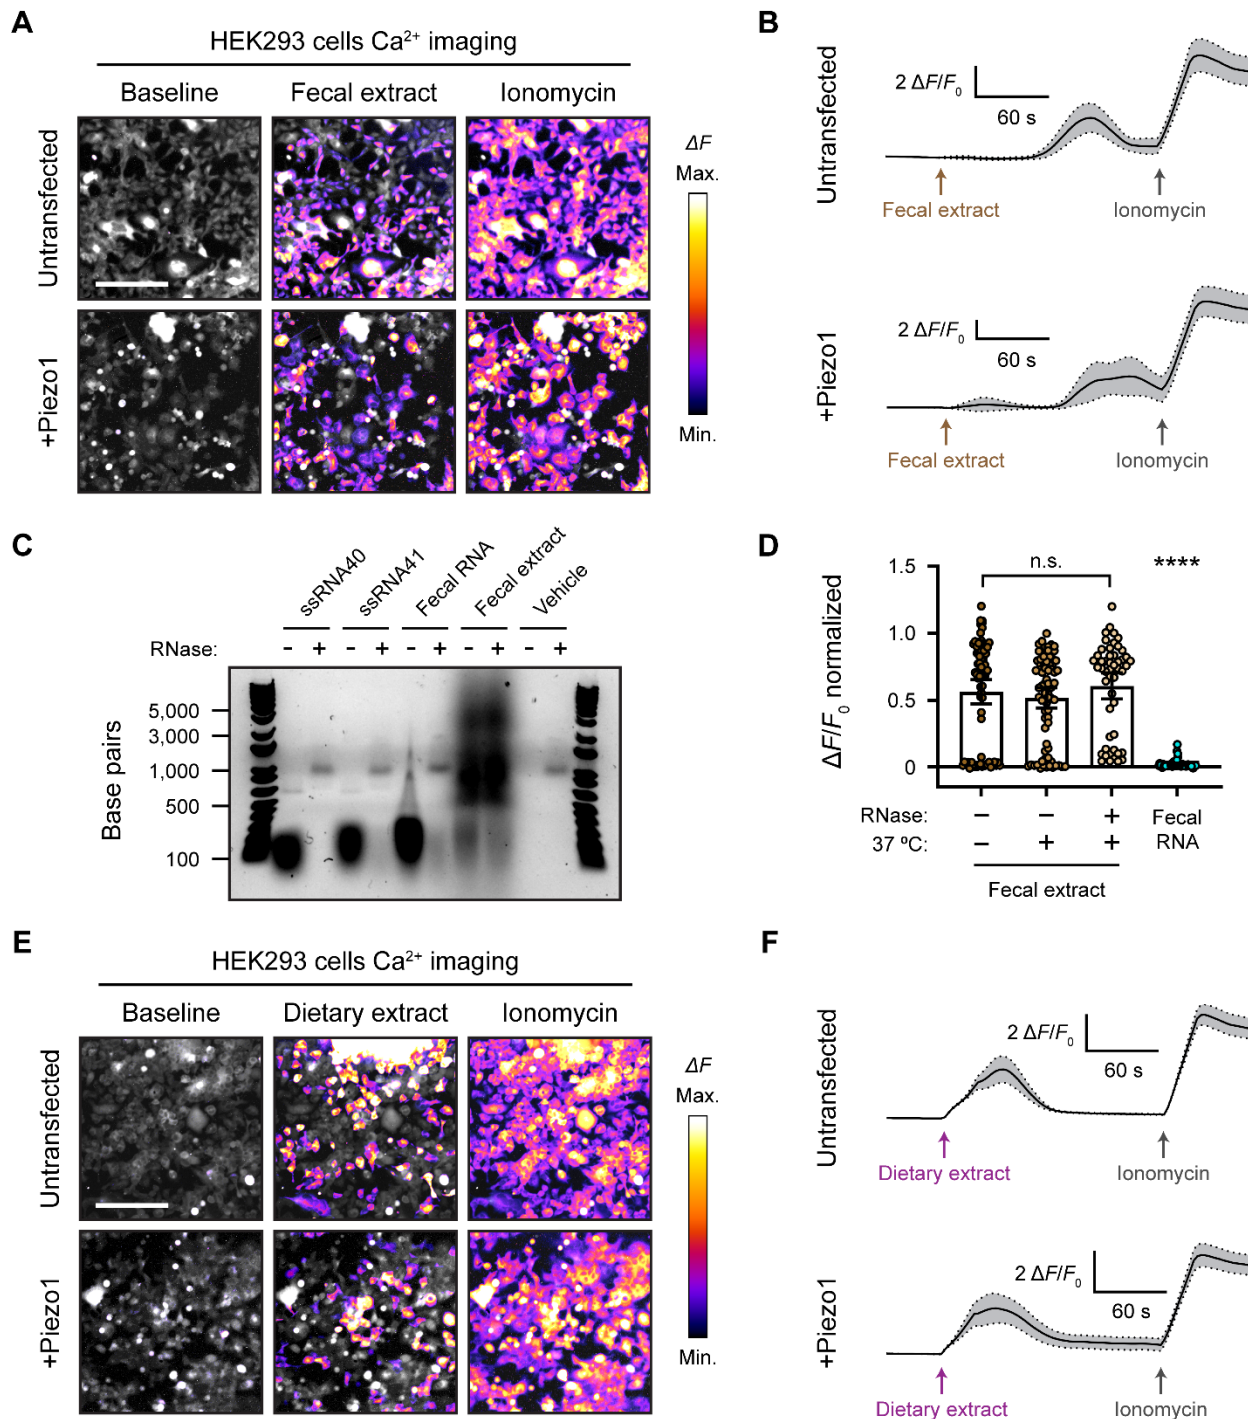

280 **Figure 3**

281 **Fecal and dietary extracts activate HEK293 cells independently of Piezo1**

282 (A) GCaMP6s calcium imaging of HEK293 cells during exposure to 5 mg/mL fecal extract, with or without  
283 *Piezo1* transfection, representative of  $\geq 3$  independent recordings for each condition. Scale bar is 200  $\mu\text{m}$ .

284 (B) Example calcium imaging traces of HEK293 cell responses to fecal extract.  $n = 50$  cells per condition  
285 plotted as mean  $\pm$  95% CI.

286 (C) Agarose gel showing the nucleic acid content of 50  $\mu\text{g/mL}$  purified fecal RNA and 100 mg/mL crude  
287 fecal extract. 50  $\mu\text{g/mL}$  of ssRNA40 and ssRNA41 were used as positive controls since they are pure  
288 RNA samples of a defined mass and sequence. Ringer's solution was used as vehicle negative control.  
289 Treating the samples with RNase A eliminated the low molecular weight nucleic acid ( $< 500$  bp). The  
290 crude fecal extract additionally had a high molecular weight smear (500 – 5,000 bp) that was unaffected  
291 by RNase A treatment, which is likely DNA.

292 (D) Quantification of *Piezo1*-transfected HEK293 cell responses to 5 mg/mL fecal extracts that were  
293 untreated (control), heat-treated (mock), or heat + RNase A-treated (RNase), as well as 10  $\mu\text{g/mL}$  fecal  
294 RNA. The  $\Delta F/F_0$  values are normalized, with the ionomycin response being  $\Delta F/F_0 = 1$ .  $n = 50$  cells per  
295 condition plotted as mean  $\pm$  95% CI. Kruskal-Wallis with Dunn's multiple comparisons test: n.s.  $p \geq 0.05$ ,  
296 \*\*\*\*  $p < 0.0001$ .

297 (E) GCaMP6s calcium imaging of HEK293 cells during exposure to 5 mg/mL dietary extract, with or  
298 without *Piezo1* transfection, representative of  $\geq 2$  independent recordings for each condition Scale bar is  
299 200  $\mu\text{m}$ .

300 (F) Example calcium imaging traces of HEK293 cell responses to dietary extract.  $n = 50$  cells per  
301 condition plotted as mean  $\pm$  95% CI.

302 See also Figure S2.

303

304

## Figure S2

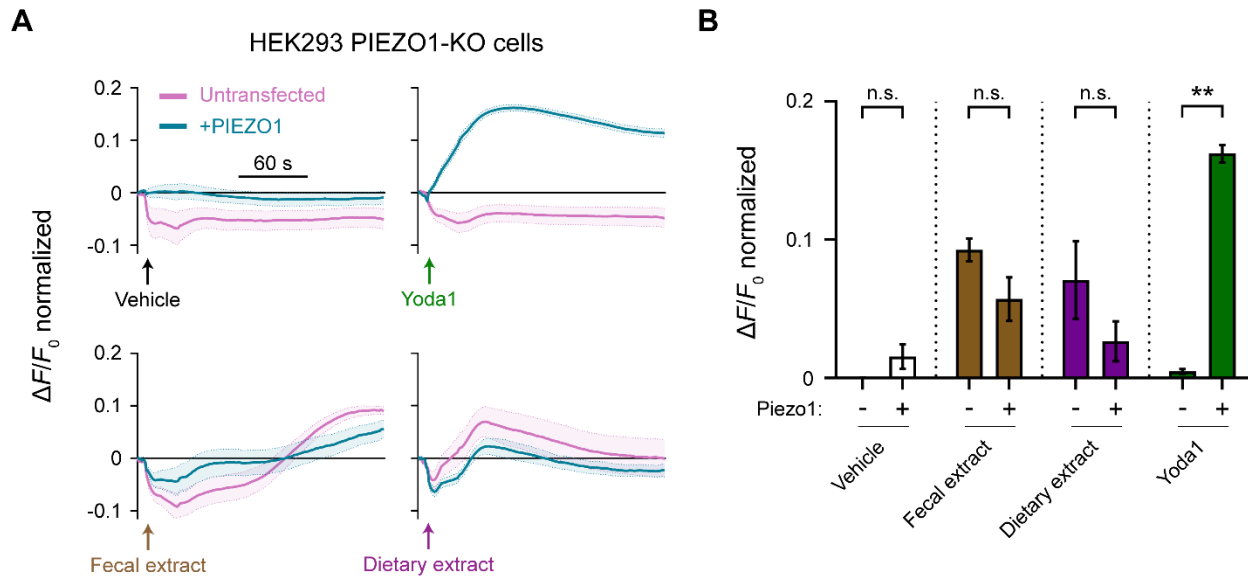

305

306

### 307 Figure S2, related to Figure 3

#### 308 Fecal and dietary extracts activate HEK293 Piezo1-KO cells

309 (A) FLIPR assays on HEK293 Piezo1-KO cells, with or without transfection of human *Piezo1*. Each  
310 treatment condition was followed up with ionomycin to elicit maximum response for normalization (not  
311 shown). Treatment concentrations are 5 mg/mL fecal or dietary extract, 5  $\mu$ M Yoda1, and 10  $\mu$ M  
312 ionomycin.  $n = 4$  wells per condition plotted as mean  $\pm$  SEM.

313 (B) Quantification of FLIPR calcium recordings for different treatments.  $n = 4$  wells per condition plotted  
314 as mean  $\pm$  SEM. Kruskal-Wallis with Dunn's multiple comparisons test: n.s.  $p \geq 0.05$ , \*\*  $p < 0.01$ .

315

316

317 Piezo1 is a non-selective ion channel that inactivates quickly (within 10 – 30 ms)  
318 (Coste et al., 2010). Therefore, calcium imaging is not the most sensitive readout of  
319 channel gating. To more definitively confirm that fecal extracts and ssRNA are not  
320 affecting Piezo1 activity, we carried out a series of whole-cell voltage-clamp recordings  
321 on *Piezo1*-transfected HEK293 cells. The cells were mechanically stimulated in the  
322 presence of ssRNA40 or fecal extract (Figure 4A). As negative and positive controls for  
323 Piezo1 agonism, vehicle solution and Yoda1 were used respectively. Across all  
324 conditions, the maximum whole-cell Piezo1 current evoked by mechanical stimulation  
325 was unchanged (Figure 4B). By contrast, Yoda1 significantly lowered the apparent  
326 mechanical threshold for Piezo1 activation (Figure 4C) and delayed channel inactivation  
327 (Figure 4D), as expected (Syeda et al., 2015). Together, our results do not provide  
328 evidence for even a limited effect of either ssRNA40 or fecal extracts on the biophysical  
329 properties of Piezo1 (Figures 4B – 4D).

330

**Figure 4**

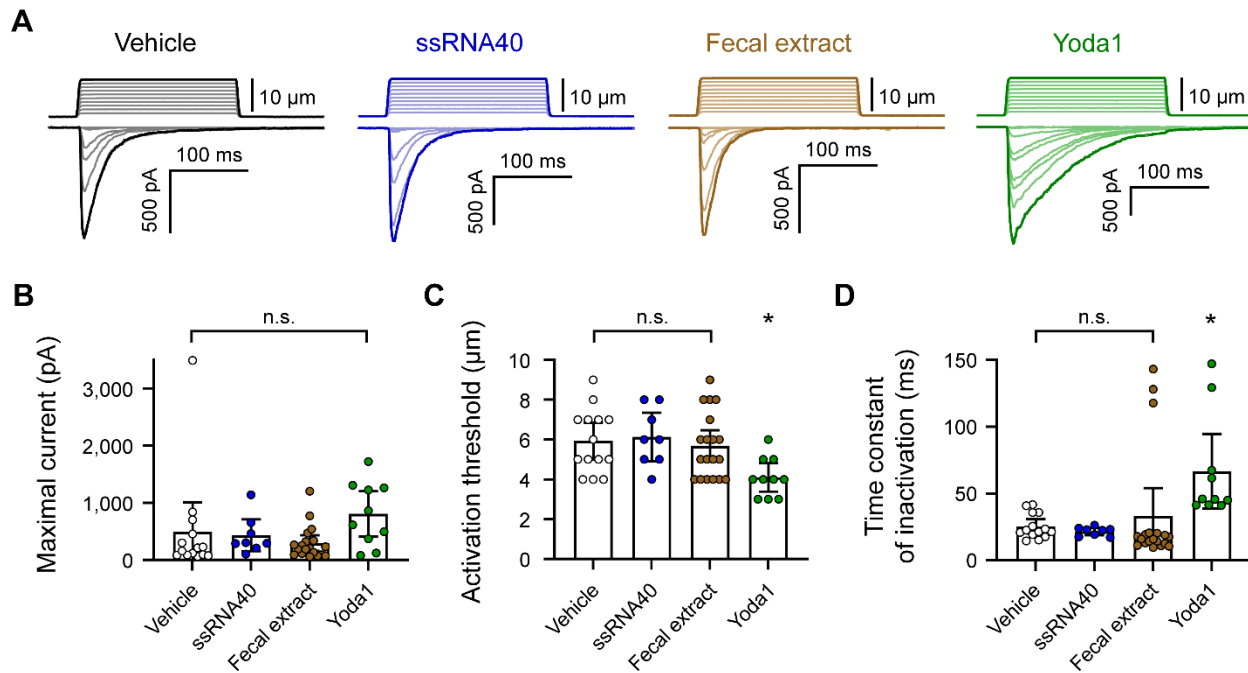

331

332

**Figure 4**

**ssRNA40 and fecal extract do not modify Piezo1 mechanotransduction**

(A) Example whole-cell voltage-clamp recordings of *Piezo1*-transfected HEK293 cells during mechanical stimulation. Top traces indicate the magnitude of plasma membrane indentation in 1  $\mu\text{m}$  steps, and bottom traces show whole-cell currents elicited by the stimuli. Vehicle, 10  $\mu\text{g}/\text{mL}$  ssRNA40, 5  $\text{mg}/\text{mL}$  fecal extract, or 30  $\mu\text{M}$  Yoda1 were bath-applied 5 minutes prior to recording.

(B – D) Quantification of mechanically evoked current amplitude, threshold, and inactivation. Individual cell responses are plotted:  $n = 14$  vehicle,  $n = 8$  ssRNA40,  $n = 19$  fecal extract, and  $n = 10$  Yoda1. Error bars represent mean  $\pm$  95% CI. One-way ANOVA with Bonferroni correction: n.s.  $p \geq 0.05$ , \*  $p < 0.05$ .

342

343 **Calcium response to fecal and dietary extracts is cell line-specific**

344 We were concerned about the potential confounding effect of fecal/dietary  
345 extract-induced activation of HEK293 cells, and we wondered whether this effect  
346 extended to other commonly used cell lines in the field. Piezo1 was originally  
347 discovered in N2a cells (Coste et al., 2010), and this cell line continues to be frequently  
348 used for *in vitro* work on Piezo1 (Geng et al., 2020; Ridone et al., 2020; Romero et al.,  
349 2019). Therefore, we compared N2a and HEK293 cells, with or without *Piezo1*  
350 transfection, during treatment with fecal/dietary extracts. Since Piezo1 is endogenously  
351 expressed in wildtype N2a cells, we performed these experiments on a Piezo1-knockout  
352 (Piezo1-KO) N2a cell line (Moroni et al., 2018).

353 The untransfected N2a Piezo1-KO cells showed no calcium response to Yoda1  
354 treatment, confirming an absence of Piezo1 (Figure 5A). Conversely, N2a Piezo1-KO  
355 cells that were transfected with *Piezo1* showed a large calcium response to Yoda1,  
356 confirming an efficient transfection. Interestingly, unlike HEK293 cells, N2a cells did not  
357 respond to either fecal or dietary extracts (Figure 5A). Moreover, *Piezo1* transfection did  
358 not endow N2a cells with sensitivity to either of these extracts (Figure 5B). From these  
359 data, we conclude that neither fecal extracts nor RNA derived from the gut microbiome  
360 can activate Piezo1. Instead, fecal/dietary extract sensitivity appears to be linked to  
361 other cell line-specific factors found in HEK293 cells but not N2a cells.

362

363

**Figure 5**

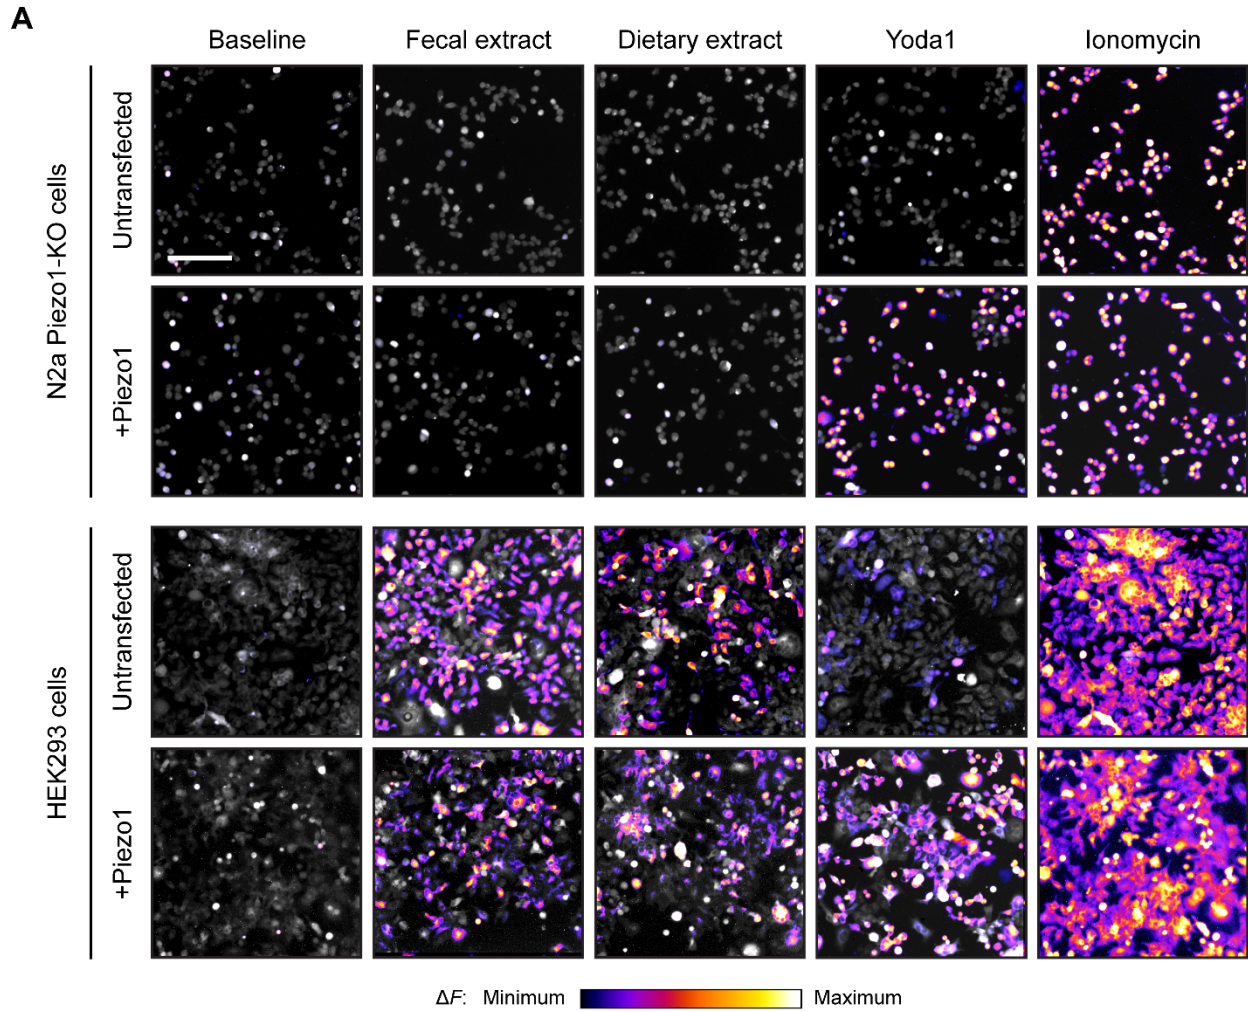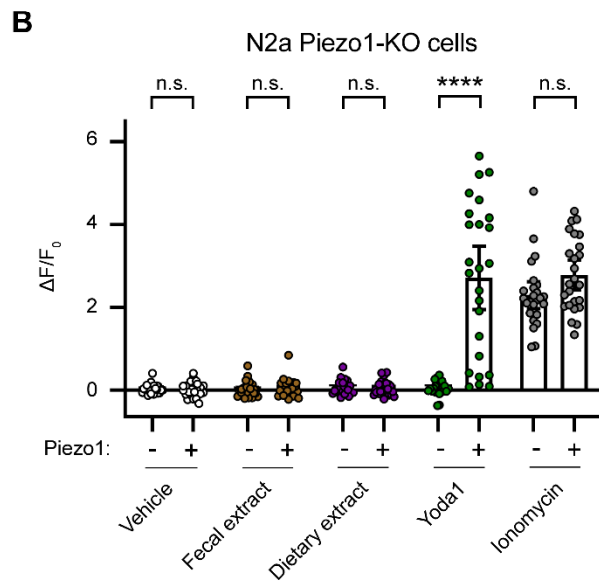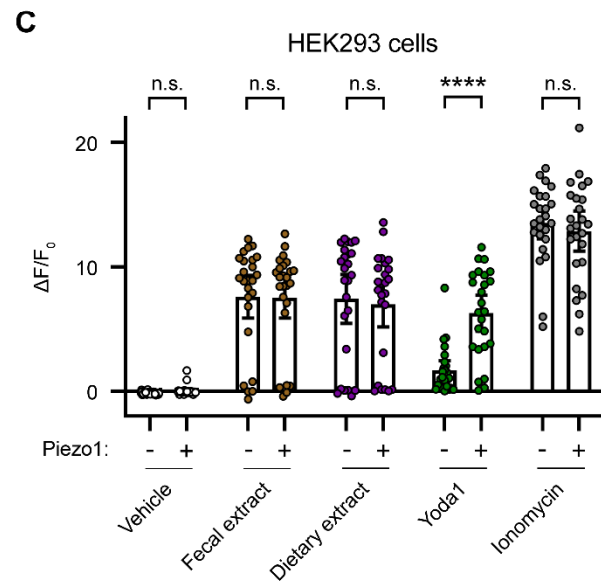



365 **Figure 5**

366 **Fecal and dietary extracts induce cell line-specific activity independently of Piezo1**

367 (A) Calcium imaging of N2a Piezo1-KO cells and HEK293 cells, with or without *Piezo1* transfection,  
368 representative of  $\geq 2$  independent recordings for each condition. Fluo-4 or GCaMP6s were used to image  
369 the N2a cells or HEK293 cells, respectively. Treatment concentrations are 5 mg/mL fecal or dietary  
370 extract, 30  $\mu$ M Yoda1, or 10  $\mu$ M ionomycin. Scale bar is 200  $\mu$ m.

371 (B) Quantification of calcium responses.  $n = 25$  cells per condition plotted as mean  $\pm$  95% CI. Pairwise  
372 comparisons between untransfected and transfected recordings using Kruskal-Wallis with Dunn's multiple  
373 comparisons test: n.s.  $p \geq 0.05$ , \*\*\*\*  $p < 0.0001$ .

## 374 **RNA activates RIN14B cells independently of Piezo1**

375           Considering that RNA-sensing by Piezo1 was originally investigated in the gut  
376 (Sugisawa et al., 2020), we sought to continue our exploration of the effect of ssRNAs in  
377 a physiologically relevant cell line, RIN14B. This pancreatic endocrine cell line is  
378 commonly used to model gut enterochromaffin cell function and natively expresses  
379 Piezo1 (Nozawa et al., 2009; Sugisawa et al., 2020). To examine the effect of ssRNAs  
380 on these cells, we performed calcium imaging in RIN14B cells transfected with  
381 GCaMP6s. We measured the change in fluorescence following addition of vehicle,  
382 ssRNA40, ssRNA41, fecal RNA, or Yoda1. Each imaging trial was followed by  
383 application of ionomycin to determine maximal fluorescence. As expected from previous  
384 experiments, the vehicle caused no significant change (Figures 6A – C). However,  
385 ssRNA40 and ssRNA41 elicited a noticeable calcium response in RIN14B cells, unlike  
386 in N2a or HEK293 cells (Figure S3A). Fecal RNA also elicited a calcium response,  
387 similar in magnitude to that caused by ssRNA40 and ssRNA41 (Figures 6D – F and  
388 Video S5). In comparison, Yoda1 led to a significantly larger increase in fluorescence,  
389 consistent with endogenous expression of Piezo1 in RIN14B cells (Figures 6G – I).

390           To investigate the dependency between the RNA-evoked response and Piezo1  
391 function in these cells, we performed calcium imaging on RIN14B cells in the presence  
392 of gadolinium. Gadolinium is a broad inhibitor of stretch-activated cation channels  
393 including Piezo1 (Coste et al., 2010). Cells were exposed first to gadolinium and then to  
394 either vehicle, fecal RNA, or Yoda1. At baseline, we noticed general effects of  
395 gadolinium on the excitability of RIN14B cells, evident by reduced spontaneous calcium  
396 transients during vehicle application (Figures 6B and 6C). Notably, gadolinium did not

397 diminish the response to fecal RNA, but it seemed to have a nonspecific effect on the  
398 decay rate of the calcium signal (Figures 6E and 6F). Gadolinium completely abolished  
399 the Yoda1 response, confirming successful Piezo1 inhibition (Figures 6H and 6I).  
400 Together, these experiments demonstrate that while RIN14B cells do respond to a  
401 variety of ssRNAs, their response is not dependent on Piezo1.

402 In addition to Piezo1, RIN14B cells and gut enterochromaffin cells express the  
403 electrophile receptor Trpa1 (Bellono et al., 2017; Nozawa et al., 2009). We speculated  
404 that Trpa1 may be responsible for the RNA-induced calcium response, considering  
405 Trpa1 has been reported to respond to extracellular microRNAs (Park et al., 2014). To  
406 test this, we performed calcium imaging on RIN14B cells in the presence of a Trpa1  
407 inhibitor, A-967079. As expected, the Trpa1 inhibitor blocked the calcium response  
408 following addition of allyl isothiocyanate (AITC), an electrophilic Trpa1 agonist (Figure  
409 S3B). However, the Trpa1 inhibitor did not significantly diminish the calcium response  
410 following addition of ssRNA40 or ssRNA41 (Figure S3B), indicating that the RNA-  
411 induced response is not dependent on Trpa1.

412 To facilitate a better understanding of the molecular basis for extracellular  
413 ssRNA-sensing, we performed single-nuclei RNA sequencing on RIN14B cells.  
414 Algorithmic clustering of individual nuclear transcriptomes revealed a homogenous cell  
415 culture population without any meaningful transcriptomic sub-populations. As a starting  
416 point for identifying candidate ssRNA receptors, we compiled a gene list based on gene  
417 ontology annotations for ion channels, cation transmembrane transporters, and G  
418 protein-coupled receptors (Table 1). The rough expression prevalence of each gene is  
419 conveyed as the fraction of cells in which that gene's transcripts were detected.

420 Additionally, we have included the entire sequencing dataset as an open resource for  
421 investigating RIN14B cell gene expression (Table S1). We anticipate these data will be  
422 useful for more deeply assessing the fidelity of the RIN14B line as a model of gut  
423 enterochromaffin cells.

**Figure 6**

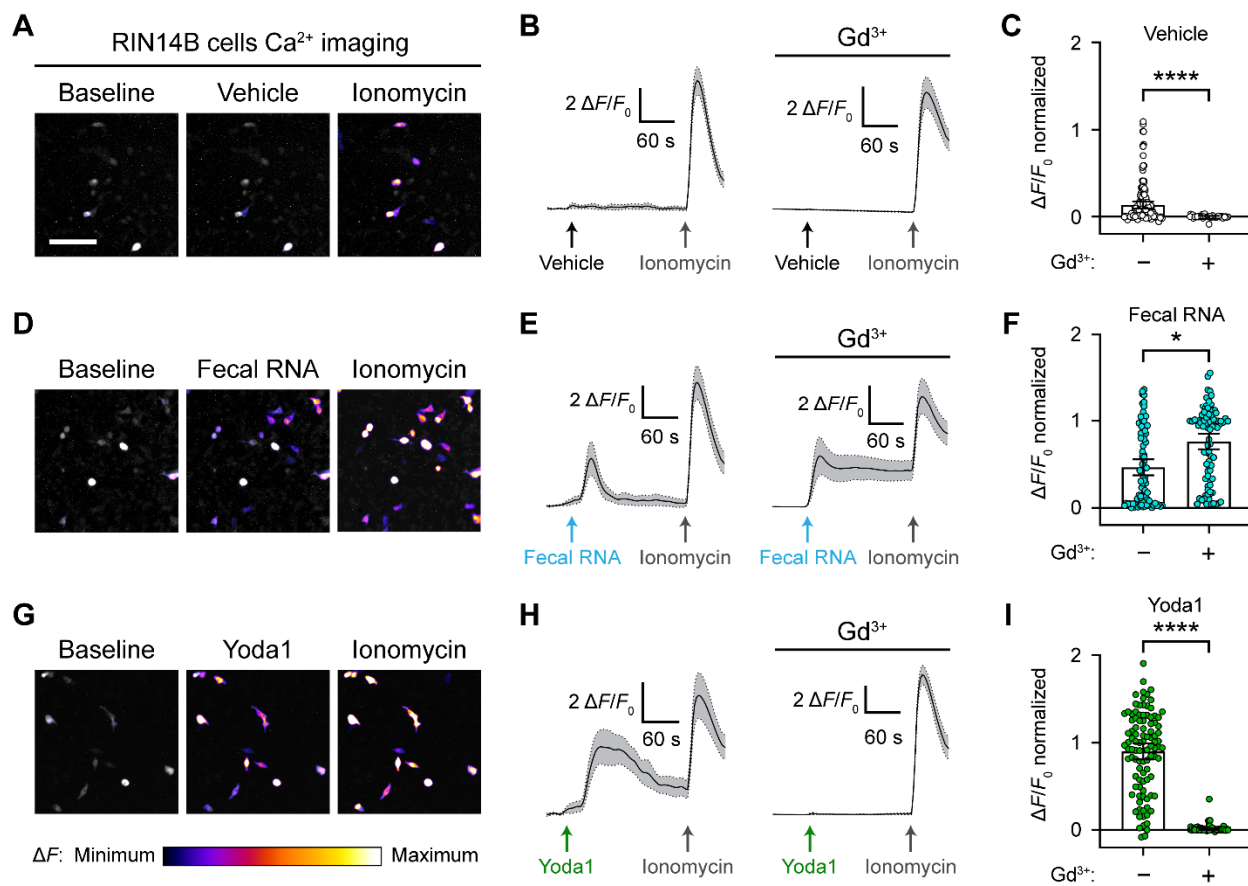

424

425

426 **Figure 6**

427 **RNA activates RIN14B cells independently of Piezo1**

428 (A – C) Calcium imaging of RIN14B cell activity during application of negative control vehicle with and  
429 without gadolinium inhibition of Piezo1. Gadolinium visibly reduced spontaneous calcium transients.

430 (D – F) RIN14B cell calcium influx in response to fecal RNA, with and without gadolinium.

431 (G – I) RIN14B cell calcium influx in response to the positive control Piezo1 agonist Yoda1, which is

432 blocked by gadolinium. The calcium imaging was performed on GCaMP6s-transfected cells. GCaMP6s

433 calcium responses were measured during stimulation with 25 µg/mL fecal RNA, 15 µM Yoda1, and 10 µM

434 ionomycin. To block Piezo1, 30 µM gadolinium was pre-incubated on the cells for 5 minutes and included

435 throughout the calcium imaging recording. Line graphs represent mean  $\pm$  95% CI of a single recording

436 each of  $n = 50$  cells. Bar graphs represent  $n = 100 - 150$  cells from  $\geq 2$  independent recordings for each

437 condition, with fluorescence values normalized to the response to ionomycin = 1.0, and the bars indicate

438 mean  $\pm$  95% CI. Pairwise comparisons between untreated and gadolinium (Gd<sup>3+</sup>)-treated recordings

439 using Kruskal-Wallis with Dunn's multiple comparisons test: \*  $p < 0.05$ , \*\*\*\*  $p < 0.0001$ . The scale bar for

440 the microscope images is 100 µm.

### Figure S3

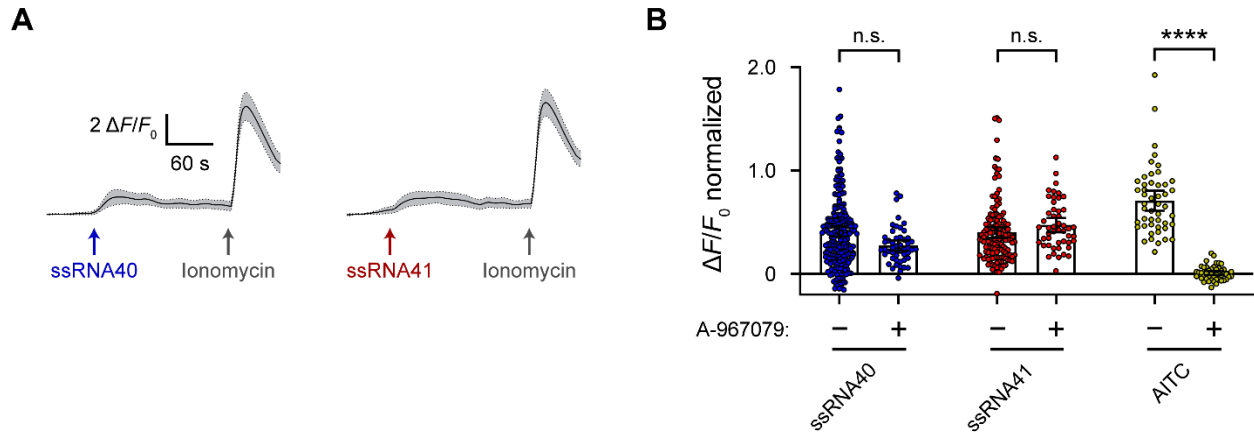

441

### 442 Figure S3

#### 443 RNA activates RIN14B cells independently of Trpa1

444 (A) Calcium imaging of ssRNA40 and ssRNA41 responses in RIN14B cells loaded with Fluo-4 AM,  
445 representative of  $\geq 3$  independent recordings for each condition. Cells were stimulated with 25  $\mu\text{g}/\text{mL}$   
446 ssRNA40 or ssRNA41 and 10  $\mu\text{M}$  ionomycin. The mean  $\Delta F/F_0 \pm 95\%$  CI is shown for a single recording  
447 each of  $n = 50$  cells.

448 (B) To block Trpa1, 10  $\mu\text{M}$  A-967079 was pre-incubated on the cells for 5 minutes and included  
449 throughout the calcium imaging recording. 10  $\mu\text{M}$  AITC was used as a positive control for Trpa1  
450 activation. Bar graphs represent  $n = 50 - 200$  cells from 1 - 4 independent recordings for each condition,  
451 with fluorescence values normalized to the response to ionomycin = 1.0, and the bars indicate mean  $\pm$   
452 95% CI. Pairwise comparisons between untreated and A-967079-treated recordings using Kruskal-Wallis  
453 with Dunn's multiple comparisons test: n.s.  $p \geq 0.05$ , \*\*\*\*  $p < 0.0001$ .

454

**Table 1. Ion channels and GPCRs in RIN14B cells**

| <b>“Ion channel activity” genes</b>           | <b>Percent of cells expressing gene</b> | <b>“GPCR activity” genes</b> | <b>Percent of cells expressing gene</b> |
|-----------------------------------------------|-----------------------------------------|------------------------------|-----------------------------------------|
| Asic1                                         | 19.5                                    | Adgra2                       | 7.7                                     |
| Asic2                                         | 42.7                                    | Adgra3                       | 8                                       |
| Chrna7                                        | 7.7                                     | Adgrb2                       | 9.2                                     |
| Clcn3                                         | 42.1                                    | Adgrb3                       | 51                                      |
| Gabrb3                                        | 16                                      | Adgrg1                       | 16.9                                    |
| Kcnd3                                         | 13.5                                    | Adgrg4                       | 15.8                                    |
| Kcnh2                                         | 8.6                                     | Adgrl1                       | 22.1                                    |
| Kcnk3                                         | 12.3                                    | Adgrl2                       | 37.2                                    |
| Mcub                                          | 37.5                                    | Adgrl3                       | 61.3                                    |
| Tmem120a                                      | 16.3                                    | Adgrv1                       | 9.2                                     |
| Trpa1                                         | 15.2                                    | Celsr2                       | 9.2                                     |
|                                               |                                         | Celsr3                       | 10.9                                    |
|                                               |                                         | Glp1r                        | 56.4                                    |
|                                               |                                         | Gpr146                       | 10.9                                    |
|                                               |                                         | Gpr158                       | 53.6                                    |
|                                               |                                         | Gpr176                       | 9.7                                     |
|                                               |                                         | Gpr6                         | 28.7                                    |
|                                               |                                         | Gprc5b                       | 14.3                                    |
|                                               |                                         | Gprc5c                       | 19.8                                    |
|                                               |                                         | Grm1                         | 23.5                                    |
|                                               |                                         | Lgr4                         | 19.8                                    |
|                                               |                                         | Lpar6                        | 9.7                                     |
|                                               |                                         | Oxtr                         | 8                                       |
|                                               |                                         | Tas1r2                       | 20.6                                    |
|                                               |                                         | Tm2d1                        | 22.9                                    |
|                                               |                                         | Tpra1                        | 9.2                                     |
|                                               |                                         | Vom2r44                      | 9.5                                     |
| <b>“Cation transmembrane transport” genes</b> | <b>Percent of cells expressing gene</b> |                              |                                         |
| Ano10                                         | 10.6                                    |                              |                                         |
| Atp13a1                                       | 18.6                                    |                              |                                         |
| Atp13a3                                       | 30.7                                    |                              |                                         |
| Atp1b1                                        | 17.2                                    |                              |                                         |
| Cnga1                                         | 8.9                                     |                              |                                         |
| Grina                                         | 10.6                                    |                              |                                         |
| Mcoln1                                        | 16.9                                    |                              |                                         |
| Nalcn                                         | 9.5                                     |                              |                                         |
| Pex5l                                         | 63                                      |                              |                                         |
| Piezo1                                        | 9.2                                     |                              |                                         |
| Slc29a4                                       | 9.2                                     |                              |                                         |
| Slc30a7                                       | 38.4                                    |                              |                                         |
| Slc30a9                                       | 71.1                                    |                              |                                         |
| Slc41a2                                       | 16.6                                    |                              |                                         |
| Tmem63a                                       | 13.2                                    |                              |                                         |
| Tmem63b                                       | 35.5                                    |                              |                                         |
| Tmem63c                                       | 36.4                                    |                              |                                         |
| Tomm40                                        | 11.2                                    |                              |                                         |
| Trpm3                                         | 49.3                                    |                              |                                         |
| Trpm7                                         | 65.9                                    |                              |                                         |
| Unc80                                         | 41.3                                    |                              |                                         |



456

## 457 **DISCUSSION**

458

459         In this study, we set out to confirm the discovery that Piezo1 is a sensor of fecal  
460 microbiome ssRNA. We were not able to detect ssRNA-evoked changes in Piezo1  
461 activity with *in vitro* calcium imaging and electrophysiological recordings. Instead, we  
462 present evidence that ssRNAs and fecal extracts can stimulate calcium influx in cultured  
463 cells, but this calcium activity depends on the cell line being used, rather than Piezo1  
464 function. An unexpected finding is that dietary extracts can elicit calcium influx similar to  
465 fecal extracts. We also observed differential effects of fecal/dietary extracts between  
466 mouse colonies in different facilities, with some preparations showing more or less  
467 activity. This highlights the importance of controlling for elements of the diet when  
468 working with gut-derived samples.

469         Our data leave open questions regarding the sources of Piezo1 activation and  
470 possible functional roles for ssRNAs in the gut. Interestingly, our observation that the  
471 enterochromaffin model cell line RIN14B responds to ssRNAs corroborates the recent  
472 evidence that there exists a gut-resident RNA receptor (Sugisawa et al., 2020).  
473 However, we are unable to reproduce the finding that Piezo1 is an RNA receptor, and  
474 we propose that Piezo1 is more likely functioning as a mechanosensor in the gut, as  
475 has been shown in many other tissues (Murthy et al., 2017; Syeda, 2021; Zhao et al.,  
476 2019).

477

478 **Supplemental figure legends**

479

480 **Figure 3-source data 1**

481 **Original uncropped RNA gel**

482 RNA and fecal samples, untreated or RNase-treated, separated on a 1% agarose gel to  
483 examine the RNA content and effect of RNase on the samples.

484

485 **Video S1**

486 **N2a cells do not respond to ssRNA40**

487 5 minute time-lapse recording of fluo-4 AM fluorescence in N2a cells during sequential  
488 exposure to 10 µg/mL ssRNA40, 30 µM Yoda1, and 10 µM ionomycin. 1 second of  
489 video is equivalent to 30 seconds of real time.

490

491 **Video S2**

492 **Mechanical stimulation assay**

493 A HEK293 cell during simultaneous mechanical stimulation and whole-cell current  
494 recording. The patch pipette (left) is sealed onto the plasma membrane, and the  
495 mechanical probe (right) indents the cell membrane to evoke Piezo1 activity. The video  
496 depicts a single 5 µm indentation as part of a larger train of step-wise indentations from  
497 1 to 10 µm.

498

499 **Video S3**

500 **HEK293 cells respond to fecal extract**

501 5 minute time-lapse of GCaMP6s fluorescence in HEK293 cells during exposure to 5  
502 mg/mL fecal extract and then 10  $\mu$ M ionomycin. 1 second of video is equivalent to 30  
503 seconds of real time.

504

505 **Video S4**

506 **HEK293 cells respond to dietary extract**

507 5 minute time-lapse of GCaMP6s fluorescence in HEK293 cells during exposure to 5  
508 mg/mL dietary extract and then 10  $\mu$ M ionomycin. 1 second of video is equivalent to 30  
509 seconds of real time.

510

511 **Video S5**

512 **RIN14B cells respond to fecal RNA**

513 5 minute time-lapse of GCaMP6s fluorescence in RIN14B cells during exposure to 25  
514  $\mu$ g/mL fecal RNA and then 10  $\mu$ M ionomycin. 1 second of video is equivalent to 30  
515 seconds of real time.

516

## 517 **Acknowledgements**

518 We thank Gary Lewin for generously providing the Piezo1-KO N2a cell line and the  
519 Janelia GENIE Project for the GCaMP6s sequence. Nick Ryba and Minh Nguyen  
520 performed the sample preparation and analysis of the single-nuclei RNA sequencing of  
521 RIN14B cells. We are grateful to Shang Ma, Chuan Wu, Jialie Luo, and Aisha AlJanahi  
522 for technical assistance in the study.

523

## 524 **Funding**

525 The research was funded by the National Center for Complementary and Integrative  
526 Health (NCCIH) and National Institute of Neurological Disorders and Stroke (NINDS)  
527 Intramural Research Programs (A.T.C.); the Howard Hughes Medical Institute and NIH  
528 R35 NS105067 (A.P.); and the National Center for Advancing Translational Sciences  
529 (NCATS) through the National Institutes of Health (NIH) Helping to End Addiction Long-  
530 term<sup>SM</sup> (HEAL) Initiative. The content is solely the responsibility of the authors and does  
531 not necessarily represent the official views of the NIH or its HEAL initiative.

532

## 533 **Author contributions**

534 A.R.N., A.P., and A.T.C. conceived and designed the study. A.R.N., S.S., G.S.O., Y.Z.,  
535 and M.N. performed all experiments. A.R.N., S.S., and G.S.O. analyzed the data and  
536 prepared figures. A.R.N. and G.S.O. wrote the initial draft of the manuscript. All authors  
537 edited the manuscript.

## 538 **MATERIALS AND METHODS**

539

### 540 **Mice**

541 All experiments involving mice adhered to the animal usage guidelines set by the  
542 National Institutes of Health (NIH) and were first approved by the National Institute of  
543 Neurological Disorders and Stroke (NINDS) Animal Care and Use Committee. Equal  
544 numbers of male/female wildtype C57BL/6J mice between the ages of 6 weeks and 1  
545 year old were used. The mice were housed in an AAALAC International accredited  
546 pathogen-free facility with *ad libitum* access to food and water. Water was purified by  
547 reverse osmosis and then UV treated and chlorinated at 15 – 18 ppm such that after  
548 two weeks the chlorine concentration was  $\geq 2$  ppm. The diet consisted purely of the  
549 chemically defined Prolab® RMH 1800 (LabDiet, 5LL2) autoclaved rodent chow.

550

### 551 **Cell culture**

552 The following cell lines were used in the study: wildtype N2a cells (ATCC, CCL-131),  
553 Piezo1-KO N2a cells (Moroni et al., 2018), wildtype HEK293 cells (ATCC, CRL-1573),  
554 PIEZO1-KO HEK293 cells (Dubin et al., 2017), GCaMP6s HEK293 cells (this study),  
555 and RIN14B cells (ATCC, CRL-2059) (Nozawa et al., 2009). All cell lines were  
556 maintained on polystyrene culture plates (Fisher Scientific, 07-200-80) in a 5% CO<sub>2</sub>  
557 humidified incubator at 37 °C. The growth medium was changed every 2 – 3 days and  
558 consisted of RPMI-1640 (for the RIN14B cells) (Fisher Scientific, 11-875-093) or  
559 otherwise DMEM/F12 (Fisher Scientific, 11330032) supplemented with 10% fetal bovine  
560 serum (Fisher Scientific, 26140079). Cells were passaged when they reached

561 confluence, which was roughly twice per week, and all cultures that were used for  
562 experiments were not propagated beyond 20 passages. For passaging, cells were  
563 rinsed in PBS (Fisher Scientific, 10010023) and then incubated in Accutase (Fisher  
564 Scientific, 00-4555-56) for ~5 minutes at 37 °C to detach. Cells were collected in a 15  
565 mL tube (Fisher Scientific, 12-565-268) and centrifuged at 300 rcf for 3 minutes to  
566 pellet. The supernatant was aspirated, and cells were resuspended in growth medium  
567 followed by plating in new polystyrene plates. Typical dilution ratios for passaging were  
568 between 1:3 and 1:20.

569

### 570 **Generating GCaMP6s stable HEK293 cells**

571 GCaMP6s was generated by a custom gene synthesis service (Epoch Life Science) and  
572 subcloned into a pLV-CMV-PGK-Hyg lentiviral vector (Cellomics Technology, LVR-  
573 1046) to make pLV-CMV-GCaMP6s-PGK-Hyg. This vector was used to produce  
574 lentiviral particles (Vigene Biosciences). Then, wildtype HEK293 cells (ATCC, CRL-  
575 1573) were infected in regular growth medium with 5 µg/mL polybrene (Sigma-Aldrich,  
576 TR-1003-G) and the lentivirus at a multiplicity of infection of 5 viral particles per cell.  
577 Transduction was allowed to occur overnight. The cells were then replated, and 48  
578 hours later 100 µg/mL Hygromycin B was added to initiate antibiotic selection. After 2  
579 weeks of culture and passaging, a hygromycin-resistant polyclonal GCaMP6s stable  
580 HEK293 cell line was isolated.

581

### 582 **Plasmid transfection**

583 Wildtype HEK293, GCaMP6s HEK293, Piezo1-KO N2a, and RIN14B cells were used in  
584 transfection experiments. Other cell lines were used untransfected to examine  
585 endogenously expressed Piezo1 (wildtype N2a cells) or were used in FLIPR  
586 experiments described further below (PIEZO1-KO HEK293 cells). Cells were seeded in  
587 24-well plates 24 – 72 hours before transfection. Transfection was performed when the  
588 cells were at ~70% confluence using 500 ng plasmid DNA and the Lipofectamine 3000  
589 kit (Fisher Scientific, L3000001) following the manufacturer's instructions. The following  
590 plasmids were used in the study: CMV-mPiezo1-IRES-eGFP, CMV-mPiezo1, and CMV-  
591 GCaMP6s. CMV-mPiezo1-IRES-eGFP was a gift from Ardem Patapoutian (Addgene  
592 plasmid #80925; <http://n2t.net/addgene:80925>) and was used for all electrophysiological  
593 recordings. CMV-mPiezo1 was previously generated in-house by subcloning mouse  
594 Piezo1 into the pcDNA5/FRT expression vector (Fisher Scientific, V601020) – this  
595 plasmid was used for all calcium imaging of Piezo1 activity. CMV-GCaMP6s was a gift  
596 from Douglas Kim and the GENIE Project (Addgene plasmid #40753;  
597 <http://n2t.net/addgene:40753>) and was used for calcium imaging of RIN14B cells.

598

### 599 **Calcium imaging**

600 Ringer's solution was used for all physiological assays, consisting of 133 mM NaCl, 3  
601 mM KCl, 2.5 mM CaCl<sub>2</sub>, 1 mM MgCl<sub>2</sub>, 10 mM glucose, 10 mM HEPES, and 40.9 mM  
602 sucrose (all from Sigma-Aldrich) dissolved in water. The pH was adjusted to 7.3 with 1  
603 M NaOH and the osmolality was ~330 mmol/kg. Calcium influx was visualized in N2a  
604 cells and HEK293 cells using Fluo-4 AM dye (Fisher Scientific, F14201) or the  
605 GCaMP6s HEK293 cell line described above. For Fluo-4 AM imaging, 50 µg Fluo-4 AM

606 was dissolved in 44  $\mu$ L DMSO (Sigma-Aldrich, D2650) and mixed with 9  $\mu$ L Pluronic F-  
607 127 (Fisher Scientific, P-3000MP) by vortexing. 50  $\mu$ L of this mixture was then diluted in  
608 14.3 mL Ringer's solution to make the "loading solution". Cells cultured in 8-chamber  
609 slides (Fisher Scientific, 177445PK) were first rinsed with Ringer's solution and then  
610 incubated in loading solution for 1 hour light-protected at room temperature. After 1  
611 hour, the loading solution was removed, the cells were rinsed with Ringer's solution,  
612 and then immediately imaged in Ringer's solution using a pco.panda sCMOS back-  
613 illuminated camera at 3 frames per second with an Olympus IX73 inverted microscope  
614 and 10x air objective. Videos were recorded and saved using pco.camware software.  
615 Solutions containing different compounds were added and removed via micropipette  
616 during video recording while maintaining the same volume (150  $\mu$ L) in the chamber.  
617 Stock solutions of all compounds were dissolved and prepared following manufacturer  
618 instructions, and the final concentration used in each experiment can be found in each  
619 figure legend. The following commercially available compounds were used in the study:  
620 ssRNA40 (Invivogen, A40-41-02), ssRNA41 (Invivogen, A41-41-02), Yoda1 (Sigma-  
621 Aldrich, SML558-5MG), AITC (Sigma-Aldrich, 377430), gadolinium(III) chloride (Sigma-  
622 Aldrich, 439770), A-967979 (Sigma-Aldrich, SML0085), and ionomycin (Sigma-Aldrich,  
623 I0634).

624 Fiji software was used to import and analyze video files from pco.camware  
625 software (pco). The Template Matching and Slice Alignment plugin was used to align all  
626 video frames to correct for any drift (Tseng et al., 2011). For creating still-frame images,  
627 a gray-scale baseline image was generated from an average of the first 10 frames of  
628 the recording. Separately, a fire-scale standard deviation Z-projection was generated



629 from the frames where the cells were exposed to a specific treatment. The Z-projection  
630 image was then overlaid on top of the gray-scale baseline image to visualize which cells  
631 responded to a given treatment. Supplemental videos were made from the raw  
632 recordings and exported at 10 frames per second so that 1 second of video is  
633 equivalent to 30 seconds of real time.

634 For quantifying responses, cellular regions of interest (ROIs) were drawn around  
635 randomly selected individual cells and used to measure the mean pixel intensity per  
636 frame. In cases where only certain regions within the field of view showed calcium  
637 influx, such as with poor fluid dispersion or the variable activation seen with fecal/dietary  
638 extracts, the ROI selection was restricted to this region of activation. We found that  
639 dissolved ssRNA40 and crude extracts produced substantial autofluorescence, which  
640 could be a confounding factor when analyzing calcium imaging recordings. However, a  
641 standard image background subtraction procedure effectively eliminated most of the  
642 fluorescence artifacts. This accomplished by drawing an additional set of 10 background  
643 ROIs per recording that were in cell-free areas in the field of view. The mean pixel  
644 intensities were exported to Microsoft Excel software for normalization and  
645 quantification. An average of the background ROI values was subtracted from each  
646 cellular ROI frame-by-frame to correct for artifactual changes in background  
647 fluorescence. These values were then used to calculate the  $\Delta F/F_0$  for each cell. The  
648 mean pixel intensity of the first 10 frames was averaged to yield  $F_0$ , and then  $F_0$  was  
649 subtracted from each frame's pixel intensity on a frame-by-frame basis to determine  $\Delta F$ .  
650 Dividing  $\Delta F$  by  $F_0$  ( $\Delta F/F_0$ ) normalized each cell's change in calcium fluorescence to its  
651 baseline level of fluorescence.

652 To quantify the maximal response to different treatments, the peak  $\Delta F/F_0$  from  
653 within the treatment exposure timeframe was selected for each cell. All recordings  
654 ended with ionomycin treatment to elicit maximum calcium influx for normalization  
655 purposes. In cases where two different recordings showed significantly different  
656 ionomycin responses, the  $\Delta F/F_0$  for experimental treatments was normalized a  
657 percentage of the peak ionomycin response.  $\Delta F/F_0$  values were exported to GraphPad  
658 8.0 (Prism) for visualization and graphing. An  $n = 25 - 50$  cells was analyzed for each  
659 calcium imaging recording and are representative of at least 3 independently performed  
660 transfections and recording sessions per condition.

661

## 662 **Electrophysiology**

663 N2a cells and HEK293 cells were plated in 35 mm dishes (Fisher Scientific, 353001)  
664 ~24 hours prior to recording, and the next day they were rinsed once in Ringer's  
665 solution before recording in Ringer's solution. Patch clamp recordings were performed  
666 in whole-cell voltage-clamp mode by glass micropipette electrodes that were pulled and  
667 polished to 2 – 6 M $\Omega$  resistance. The pipette was filled with internal solution consisting  
668 of 133 mM CsCl, 1 mM CaCl<sub>2</sub>, 1 mM MgCl<sub>2</sub>, 5 mM EGTA, 10 mM HEPES, 4 mM Mg-  
669 ATP, 0.4 mM Na<sub>2</sub>-GTP, 43.8 mM sucrose (all from Sigma-Aldrich). Internal solution pH  
670 was adjusted to 7.3 with 1 M CsOH and the osmolality was ~320 mmol/kg. After  
671 establishing a G $\Omega$  seal with the patch pipette on a cell membrane and breaking into  
672 whole-cell configuration, cells were held at -80 mV and mechanically stimulated with a  
673 separate glass polished probe to elicit Piezo1 currents. The probe was a micropipette  
674 that was heat-polished to seal the tip until rounded with a width of 3 – 5  $\mu$ m. The probe

675 was attached to a piezoelectric translator (Physik Instrumente, P841.20) and mounted  
676 on a micromanipulator (Sutter Instrument, MP-225) at 45° angle to the cell surface. To  
677 stimulate the cells, the probe was maneuvered to rest ~1 μm above the cell surface and  
678 then sequentially indented for 200 ms in 1 μm increments from 1 – 10 μm with a 2 ms  
679 ramp time. Each indentation was separated by 2 seconds. Whole-cell currents were  
680 measured by a Multiclamp 700b amplifier (Molecular Devices) and digitized by a  
681 Digidata 1550 (Molecular Devices) at 100 kHz and then low-pass filtered at 10 kHz. The  
682 signals were saved digitally using Clampex 11.1 software (Molecular Devices).

683       Clampfit 11.1 software (Molecular Devices) was used to analyze the  
684 electrophysiological recordings. Any whole-cell recording showing a static leak current >  
685 200 pA was discarded from analysis due to poor patch seal quality. Additionally, cells  
686 with a peak mechanically evoked current < 30 pA were considered non-responders and  
687 discarded, since these currents are near the baseline noise level and their kinetics could  
688 not be reliably analyzed. Additionally, cells with a peak current > 4,000 pA were  
689 discarded due to the abnormally high values and generally unhealthy swelled  
690 morphology of such cells. Finally, recordings were discarded if the patch pipette seal  
691 broke before three consecutive mechanically evoked responses, because low  
692 indentation responses have distinct kinetics that bias analysis. In the end, an equal  
693 number of recordings (5 – 7) were discarded from each condition (from a total of 15 –  
694 25 attempted cells/condition), with no apparent systematic bias toward any of the  
695 control or ssRNA conditions. The remaining recordings (one per cell) were filtered at 1  
696 kHz and thresholded to 0 pA. The maximal current was measured by the largest  
697 amplitude response before patch breakage or by reaching 10 μm membrane

698 indentation, whichever came first. This same response was then used to approximate  
699 the time constant of inactivation ( $\tau$ ) by calculating the time taken to decay 63.2% back  
700 to baseline. The mechanical activation threshold was determined by the level of  
701 membrane indentation ( $\mu\text{m}$ ) to elicit the first current response peak (pA) above the  
702 baseline level of noise. No systematic differences were observed for baseline noise  
703 level or maximum membrane indentation between conditions. Values were exported  
704 from Clampfit 11.1 to Graphpad 8.0 (Prism) for visualization and graphing. A minimum  
705 of  $n = 7$  cells were analyzed per recording condition.

706

### 707 **FLIPR assay**

708 PIEZO1-KO HEK293 or wildtype HEK293 cells were grown in Dulbecco's modified  
709 Eagle's medium containing 4.5 mg/ml glucose, 10% fetal bovine serum, and 1x  
710 pen/strep. Cells were plated in 6-well plates and transfected using Lipofectamine 2000  
711 (ThermoFisher Scientific), according to the manufacturer's instructions. Human PIEZO1  
712 fused to IRES-TdTomato or mouse Piezo1 fused to IRES-GFP was transfected at 2  $\mu\text{g}$   
713 per well (6-well plate) for fluorescent imaging plate reader (FLIPR). One day after  
714 transfection, the cells were dissociated from 6-well plates with trypsin and re-seeded  
715 into a 384-well plate, at 20,000 cells per well. The plate was then cultured for 1 day  
716 before washing with assay buffer (1x HBSS, 10 mM HEPES, pH 7.4) in a ELx405 CW  
717 plate washer (BioTek Instruments). The cells were then incubated with 1.25  $\mu\text{M}$  calcium  
718 indicator Fluo-8 AM (AAT Bioquest) in the assay buffer at 37 C for 1 hour. After washing  
719 out excess dye, fluorescence was measured on a fluorescent imaging plate reader  
720 (FLIPR) Tetra upon treatment with various reagents. A 1 mM stock solution of Yoda1 in

721 dimethyl sulfoxide (DMSO) was used resulting in a final concentration of 5  $\mu$ M Yoda1  
722 and 0.5% DMSO in the assay. The effect of ssRNA40 was tested at concentrations of 5,  
723 2.5, 1.25, 0.625  $\mu$ g/ml. Ionomycin was added to 10  $\mu$ M concentration as a final  
724 normalization. All measurements were taken from 4 biological replicates (4 different  
725 wells in 384-well plate).

726

### 727 **Crude extract preparations**

728 Fresh mouse feces were gathered by gently holding the mouse over a sterile 1.5 mL  
729 tube and collecting the fecal matter directly into the tube as it was excreted. Feces from  
730 10 – 20 adult mice were pooled together, diluted to 0.1 g/mL in Ringer's solution, and  
731 homogenized using a sterile mortar and pestle. The sample was then centrifuged at 300  
732 rcf for 3 minutes to pellet any remaining undissolved fecal matter and then sequentially  
733 filtered through 100, 40, and finally 0.45  $\mu$ m mesh membranes (Fisher Scientific,  
734 SLHAR33SS) to produce the "fecal extract". Because this extract was strongly  
735 autofluorescent during calcium imaging, the fecal extract was further diluted 1:20 in  
736 Ringer's solution from its original 0.1 g/mL to a final concentration of 5 mg/mL when  
737 applying it to cell cultures. Dietary extracts were prepared in identical fashion to fecal  
738 extracts, with the exception that mouse food pellets were first crushed in a dry state  
739 using mortar and pestle and then transferred to Ringer's solution (0.1 g/mL).

740 Four different fecal extract preparations and three different dietary extract  
741 preparations were independently made and tested over the course of the study at the  
742 NIH. A separate set of fecal and dietary extracts were prepared from mice at  
743 Scripps/HHMI. The NIH-sourced extracts showed substantially more stimulatory activity

744 on HEK293 cells when tested in parallel with the Scripps/HHMI extracts, indicating  
745 possible differences owing to the specific mouse colony and commercial diet source.  
746 For RNase treatment of fecal extracts, RNase A (Fisher Scientific, EN0531) was added  
747 at a final concentration of 500  $\mu\text{g}/\text{mL}$  to the 0.1 g/mL fecal extract and incubated at 37  
748  $^{\circ}\text{C}$  for 30 minutes. Mock-treated fecal extracts were handled in the same way but  
749 without addition of RNase A. The RNase- and mock-treated fecal extracts were then  
750 used for calcium imaging on Piezo1-transfected HEK293 cells at a final concentration of  
751 5 mg feces per mL.

752 To ensure that the fecal and dietary extracts were not nonspecifically activating  
753 cells due to changes in osmolality or pH, these properties were examined in extracts  
754 that were diluted to the working concentration of 5 mg/mL in Ringer's solution. The  
755 control Ringer's solution that was tested had an osmolality of  $\sim 336$  mmol/kg and 7.5 pH.  
756 In comparison, fecal extract was  $\sim 332$  mmol/kg and 7.5 pH, and dietary extract was  
757  $\sim 334$  mmol/kg and 7.5 pH. These measurements indicate that the extracts did not  
758 substantially affect the osmolality or pH of the solutions.

759

### 760 **Fecal RNA purification**

761 RNA was extracted from mouse feces by a standard phenol/chloroform protocol. 500  $\mu\text{L}$   
762 TRIzol (Fisher Scientific, 15596026) was added per 50 mg feces and then homogenized  
763 using an RNase-free tube and plunger (Takara, 9791A). 100  $\mu\text{L}$  chloroform (Sigma-  
764 Aldrich) was then added per 500  $\mu\text{L}$  TRIzol, vortexed vigorously followed by 3 minute  
765 incubation at room temperature, and then centrifuged at 12,000 rcf for 10 minutes at 4  
766  $^{\circ}\text{C}$ . The aqueous layer was transferred to a clean tube and the RNA was extracted

767 using the miRNeasy kit (Qiagen, 217004) following manufacturer's instructions. The  
768 RNA content of the samples was measured using a NanoDrop (Fisher Scientific, ND-  
769 2000), confirming a ~2.0 ratio of 260/280 nm absorbance. These purified RNA samples  
770 yielded ~ 300 ng/ $\mu$ L RNA, while RNA in the crude fecal extracts was below the  
771 detection range of the NanoDrop. The samples were separated on an agarose gel and  
772 examined for nucleic acid content. The purified fecal RNA manifested as a smear,  
773 ranging from short oligonucleotides tens of base pairs (bp) in size up to 300 bp (Figure  
774 3C). To confirm that the samples were in fact RNA and not DNA, fecal extracts and  
775 purified fecal RNA were treated with 500  $\mu$ g/mL RNase A (Fisher Scientific, EN0531) for  
776 30 minutes at 37 °C before running on an agarose gel (Figure 3C). The fecal RNA was  
777 then tested on Piezo1-transfected HEK293 cells at a final concentration of 10  $\mu$ g/mL,  
778 which was the same concentration used in the Sugisawa study (Figure 3D).

779         Additionally, fecal RNA was purified using the same methodology and  
780 Nucleospin Triprep kit (Macherey-Nagel, 740966.10) as in the Sugisawa study,  
781 following the manufacturer's instructions. 350  $\mu$ L buffer RP1 was added per 50 mg  
782 feces, and the samples were homogenized using an RNase-free tube and plunger  
783 (Takara, 9791A) and then vortexed for 5 seconds. A wide-bore pipette was then used to  
784 transfer the samples to a Nucleospin filter, and the RNA was washed and extracted  
785 following the Triprep protocol. RNA concentration was 100 – 200 ng/ $\mu$ L and the purity  
786 was confirmed by a ~2.0 ratio of 260/280 nm absorbance via NanoDrop. Applying these  
787 purified fecal RNA samples at a final concentration of 10  $\mu$ g/mL did not elicit calcium  
788 influx in Piezo1-transfected HEK293 cells.

789

## 790 **Single-nuclei RNA sequencing**

791 RIN14B cells were put on ice, washed with chilled PBS, and then lysed with chilled  
792 Nuclei EZ lysis buffer (Sigma-Aldrich, NUC-101). Single cells were isolated with a 40  
793  $\mu\text{m}$  filter and pelleted in a centrifuge for 8 minutes, 800 rcf, 4 °C. The nuclei were  
794 resuspended using PBS with 1% BSA and counted using a hemocytometer with trypan  
795 blue viability dye. The nuclei were centrifuged and resuspended at an appropriate  
796 volume for the 10X Chromium system (10X Genomics). The nuclei were counted once  
797 more to check the number and quality before proceeding with 10X Chromium  
798 processing and library construction as per the manufacturer's instructions. Next Gen  
799 sequencing with a Chromium V2 chemistry was carried out on an Illumina NextSeq 500.  
800 Illumina NextSeq 500 pre-mRNA sequencing data were aligned to the *rattus norvegicus*  
801 genome using CellRanger. The data were then analyzed with Seurat V3.0 as described  
802 previously (Butler et al., 2018).

803

## 804 **Statistical analysis**

805 All data were first tested for normality using the Shapiro-Wilk test. Normally distributed  
806 data were analyzed by one-way ANOVA with Bonferroni multiple comparisons  
807 correction, and non-normally distributed data were analyzed by Kruskal Wallis test with  
808 Dunn's multiple comparisons correction. Statistical significance was determined by a  $p$   
809 value less than 0.05. The degree of statistical significance is indicated in each figure  
810 legend using asterisks. 1 cell equals 1 biological replicate for calcium imaging and  
811 electrophysiology experiments. The  $n$  number of biological replicates for each condition  
812 are representative of at least 3 separately run experiments. The  $n$  and error bar



813 definitions are reported in each figure legend. No power analyses were done to  
814 determine sample sizes *a priori*, but our sample sizes adhere to those reported in  
815 similar previous studies (Sugisawa et al., 2020). All graphing and statistical testing was  
816 performed in GraphPad 8.0 software (Prism) and figures were assembled in Adobe  
817 Illustrator 2021.

818

### 819 **Data availability**

820 The single-nuclei RNA sequencing data of the RIN14B cell line have been deposited in  
821 the Gene Expression Omnibus (GEO) database under accession number GSE213903.  
822 It can be accessed while it remains in private status using the following secure token:  
823 izkjgeiwjtdheh.

824

825

826

827 **REFERENCES**

828

829 Albuissou, J., Murthy, S.E., Bandell, M., Coste, B., Louis-Dit-Picard, H., Mathur, J.,

830 Fénéant-Thibault, M., Tertian, G., De Jaureguiberry, J.P., Syfuss, P.Y., et al. (2013).

831 Dehydrated hereditary stomatocytosis linked to gain-of-function mutations in

832 mechanically activated PIEZO1 ion channels. *Nat. Commun.* *4*, 1884.

833 Bae, C., Gnanasambandam, R., Nicolai, C., Sachs, F., and Gottlieb, P.A. (2013).

834 Xerocytosis is caused by mutations that alter the kinetics of the mechanosensitive

835 channel PIEZO1. *Proc. Natl. Acad. Sci. U. S. A.* *110*, E1162–E1168.

836 Bellono, N.W., Bayrer, J.R., Leitch, D.B., Castro, J., Zhang, C., O'Donnell, T.A.,

837 Brierley, S.M., Ingraham, H.A., and Julius, D. (2017). Enterochromaffin Cells Are Gut

838 Chemosensors that Couple to Sensory Neural Pathways. *Cell* *170*, 185-198.e16.

839 Borbiro, I., Badheka, D., and Rohacs, T. (2015). Activation of TRPV1 channels inhibits

840 mechanosensitive Piezo channel activity by depleting membrane phosphoinositides.

841 *Sci. Signal.* *8*, ra15.

842 Botello-smith, W.M., Jiang, W., Lacroix, J.J., and Luo, Y. (2019). A mechanism for the

843 activation of the mechanosensitive Piezo1 channel by the small molecule Yoda1. *Nat.*

844 *Commun.* *10*, 4503.

845 Butler, A., Hoffman, P., Smibert, P., Papalexi, E., and Satija, R. (2018). Integrating

846 single-cell transcriptomic data across different conditions, technologies, and species.

847 *Nat. Biotechnol.* *36*, 411–420.

848 Cahalan, S.M., Lukacs, V., Ranade, S.S., Chien, S., Bandell, M., and Patapoutian, A.

849 (2015). Piezo1 links mechanical forces to red blood cell volume. *Elife* *4*, e07370.

850 Chesler, A.T., Szczot, M., Bharucha-Goebel, D., Čeko, M., Donkervoort, S., Laubacher,  
851 C., Hayes, L.H., Alter, K., Zampieri, C., Stanley, C., et al. (2016). The Role of PIEZO2 in  
852 Human Mechanosensation. *N. Engl. J. Med.* *375*, 1355–1364.

853 Chiu, I.M., Barrett, L.B., Williams, E.K., Strohlic, D.E., Lee, S., Weyer, A.D., Lou, S.,  
854 Bryman, G.S., Roberson, D.P., Ghasemlou, N., et al. (2014). Transcriptional profiling at  
855 whole population and single cell levels reveals somatosensory neuron molecular  
856 diversity. *Elife* *3*, e04660.

857 Cinar, E., Zhou, S., Decourcey, J., Wang, Y., Waugh, R.E., and Wan, J. (2015). Piezo1  
858 regulates mechanotransductive release of ATP from human RBCs. *Proc. Natl. Acad.*  
859 *Sci. U. S. A.* *112*, 11783–11788.

860 Coste, B., Mathur, J., Schmidt, M., Earley, T.J., Ranade, S., Petrus, M.J., Dubin, A.E.,  
861 and Patapoutian, A. (2010). Piezo1 and Piezo2 Are Essential Components of Distinct  
862 Mechanically Activated Cation Channels. *Science* (80-. ). *330*, 55–60.

863 Dubin, A.E., Schmidt, M., Mathur, J., Petrus, M.J., Xiao, B., Coste, B., and Patapoutian,  
864 A. (2012). Inflammatory Signals Enhance Piezo2-Mediated Mechanosensitive Currents.  
865 *Cell Rep.* *2*, 511–517.

866 Dubin, A.E., Murthy, S., Lewis, A.H., Brosse, L., Cahalan, S.M., Grandl, J., Coste, B.,  
867 and Patapoutian, A. (2017). Endogenous Piezo1 Can Confound Mechanically Activated  
868 Channel Identification and Characterization. *Neuron* *94*, 266–270.

869 Eisenhoffer, G.T., Loftus, P.D., Yoshigi, M., Otsuna, H., Chien, C. Bin, Morcos, P.A.,  
870 and Rosenblatt, J. (2012). Crowding induces live cell extrusion to maintain homeostatic  
871 cell numbers in epithelia. *Nature* *484*, 546–549.

872 Faucherre, A., Kissa, K., Nargeot, J., Mangoni, M.E., and Jopling, C. (2014). Piezo1

873 plays a role in erythrocyte volume homeostasis. *Haematologica* 99, 70–75.

874 Fotiou, E., Martin-Almedina, S., Simpson, M.A., Lin, S., Gordon, K., Brice, G., Atton, G.,  
875 Jeffery, I., Rees, D.C., Mignot, C., et al. (2015). Novel mutations in PIEZO1 cause an  
876 autosomal recessive generalized lymphatic dysplasia with non-immune hydrops fetalis.  
877 *Nat. Commun.* 6, 8085.

878 Gaub, B.M., and Müller, D.J. (2017). Mechanical Stimulation of Piezo1 Receptors  
879 Depends on Extracellular Matrix Proteins and Directionality of Force. *Nano Lett.* 17,  
880 2064–2072.

881 Geng, J., Liu, W., Zhou, H., Zhang, T., Wang, L., Zhang, M., Li, Y., Shen, B., Li, X., and  
882 Xiao, B. (2020). A Plug-and-Latch Mechanism for Gating the Mechanosensitive Piezo  
883 Channel. *Neuron* 106, 438-451.e6.

884 Glogowska, E., Schneider, E.R., Maksimova, Y., Schulz, V.P., Lezon-Geyda, K., Wu, J.,  
885 Radhakrishnan, K., Keel, S.B., Mahoney, D., Freidmann, A.M., et al. (2017). Novel  
886 mechanisms of PIEZO1 dysfunction in hereditary xerocytosis. *Blood* 130, 1845–1856.

887 Heil, F., Hemmi, H., Hochrein, H., Ampenberger, F., Kirschning, C., Akira, S., Lipford,  
888 G., Wagner, H., and Bauer, S. (2004). Species-Specific Recognition of Single-Stranded  
889 RNA via Toll-like Receptor 7 and 8. *Science* (80-. ). 303, 1526–1530.

890 Hendrickx, G., Fischer, V., Liedert, A., von Kroge, S., Haffner-Luntzer, M., Brylka, L.,  
891 Pawlus, E., Schweizer, M., Yorgan, T., Baranowsky, A., et al. (2021). Piezo1  
892 Inactivation in Chondrocytes Impairs Trabecular Bone Formation. *J. Bone Miner. Res.*  
893 36, 369–384.

894 Jiang, F., Yin, K., Wu, K., Zhang, M., Wang, S., Cheng, H., Zhou, Z., and Xiao, B.  
895 (2021). The mechanosensitive Piezo1 channel mediates heart mechano-chemo

896 transduction. *Nat. Commun.* 12, 869.

897 Kupari, J., Häring, M., Agirre, E., Castelo-Branco, G., and Ernfors, P. (2019). An Atlas of  
898 Vagal Sensory Neurons and Their Molecular Specialization. *Cell Rep.* 2508–2523.

899 Lee, W., Leddy, H.A., Chen, Y., Lee, S.H., Zelenski, N.A., McNulty, A.L., Wu, J.,  
900 Beicker, K.N., Coles, J., Zauscher, S., et al. (2014). Synergy between Piezo1 and  
901 Piezo2 channels confers high-strain mechanosensitivity to articular cartilage. *Proc. Natl.*  
902 *Acad. Sci. U. S. A.* 111, E5114–E5122.

903 Lehmann, S.M., Rosenberger, K., Krüger, C., Habbel, P., Derkow, K., Kaul, D., Rybak,  
904 A., Brandt, C., Schott, E., Wulczyn, F.G., et al. (2012). Extracellularly Delivered Single-  
905 Stranded Viral RNA Causes Neurodegeneration Dependent on TLR7. *J. Immunol.* 189,  
906 1448–1458.

907 Li, J., Hou, B., Tumova, S., Muraki, K., Bruns, A., Ludlow, M.J., Sedo, A., Hyman, A.J.,  
908 McKeown, L., Young, R.S., et al. (2014). Piezo1 integration of vascular architecture with  
909 physiological force. *Nature* 515, 279–282.

910 Li, X., Han, L., Nookaew, I., Mannen, E., Silva, M.J., Almeida, M., and Xiong, J. (2019).  
911 Stimulation of Piezo1 by mechanical signals promotes bone anabolism. *Elife* 8, e49631.

912 Liu, T., Du, X., Zhang, B., Zi, H., Yan, Y., Yin, J., Hou, H., Gu, S., Chen, Q., and Du, J.  
913 (2020). Piezo1-Mediated Ca<sup>2+</sup> Activities Regulate Brain Vascular Pathfinding during  
914 Development. *Neuron* 108, 180–192.

915 Lukacs, V., Mathur, J., Mao, R., Bayrak-Toydemir, P., Procter, M., Cahalan, S.M., Kim,  
916 H.J., Bandell, M., Longo, N., Day, R.W., et al. (2015). Impaired PIEZO1 function in  
917 patients with a novel autosomal recessive congenital lymphatic dysplasia. *Nat.*  
918 *Commun.* 6, 8329.

919 Martins, J.R., Penton, D., Peyronnet, R., Arhatte, M., Moro, C., Picard, N., Kurt, B.,  
920 Patel, A., Honoré, E., and Demolombe, S. (2016). Piezo1-dependent regulation of  
921 urinary osmolarity. *Pflugers Arch. Eur. J. Physiol.* 468, 1197–1206.

922 Miyamoto, T., Mochizuki, T., Nakagomi, H., Kira, S., Watanabe, M., Takayama, Y.,  
923 Suzuki, Y., Koizumi, S., Takeda, M., and Tominaga, M. (2014). Functional role for  
924 Piezo1 in stretch-evoked Ca<sup>2+</sup> influx and ATP release in Urothelial cell cultures. *J. Biol.*  
925 *Chem.* 289, 16565–16575.

926 Moroni, M., Servin-Vences, M.R., Fleischer, R., Sánchez-Carranza, O., and Lewin, G.R.  
927 (2018). Voltage gating of mechanosensitive PIEZO channels. *Nat. Commun.* 9, 1096.

928 Murthy, S.E., Dubin, A.E., and Patapoutian, A. (2017). Piezos thrive under pressure:  
929 mechanically activated ion channels in health and disease. *Nat. Rev. Mol. Cell Biol.*

930 Narayanan, P., Hütte, M., Kudryasheva, G., Taberner, F.J., Lechner, S.G., Rehfeldt, F.,  
931 Gomez-Varela, D., and Schmidt, M. (2018). Myotubularin related protein-2 and its  
932 phospholipid substrate PIP2 control Piezo2-mediated mechanotransduction in  
933 peripheral sensory neurons. *Elife* 7, e32346.

934 Nguyen, M.Q., Wu, Y., Bonilla, L.S., von Buchholtz, L.J., and Ryba, N.J.P. (2017).  
935 Diversity amongst trigeminal neurons revealed by high throughput single cell  
936 sequencing. *PLoS One* 12, e0185543.

937 Nonomura, K., Lukacs, V., Sweet, D.T., Goddard, L.M., Kanie, A., Whitwam, T.,  
938 Ranade, S.S., Fujimori, T., Kahn, M.L., and Patapoutian, A. (2018). Mechanically  
939 activated ion channel PIEZO1 is required for lymphatic valve formation. *Proc. Natl.*  
940 *Acad. Sci. U. S. A.* 115, 12817–12822.

941 Nozawa, K., Kawabata-Shoda, E., Doihara, H., Kojima, R., Okada, H., Mochizuki, S.,

942 Sano, Y., Inamura, K., Matsushime, H., Koizumi, T., et al. (2009). TRPA1 regulates  
943 gastrointestinal motility through serotonin release from enterochromaffin cells. *Proc.*  
944 *Natl. Acad. Sci. U. S. A.* *106*, 3408–3413.

945 Park, C.K., Xu, Z.Z., Berta, T., Han, Q., Chen, G., Liu, X.J., and Ji, R.R. (2014).  
946 Extracellular microRNAs Activate nociceptor neurons to elicit pain via TLR7 and  
947 TRPA1. *Neuron* *82*, 47–54.

948 Pathak, M.M., Nourse, J.L., Tran, T., Hwe, J., Arulmoli, J., Le, D.T.T., Bernardis, E.,  
949 Flanagan, L.A., and Tombola, F. (2014). Stretch-activated ion channel Piezo1 directs  
950 lineage choice in human neural stem cells. *Proc. Natl. Acad. Sci. U. S. A.* *111*, 16148–  
951 16153.

952 Ranade, S., Woo, S., Dubin, A., Moshourab, R., Wetzel, C., Petrus, M., Mathur, J.,  
953 Bégay, V., Coste, B., Mainquist, J., et al. (2014a). Piezo2 is the major transducer of  
954 mechanical forces for touch sensation in mice. *Nature* *516*, 121–125.

955 Ranade, S.S., Qiu, Z., Woo, S.H., Hur, S.S., Murthy, S.E., Cahalan, S.M., Xu, J.,  
956 Mathur, J., Bandell, M., Coste, B., et al. (2014b). Piezo1, a mechanically activated ion  
957 channel, is required for vascular development in mice. *Proc. Natl. Acad. Sci. U. S. A.*  
958 *111*, 10347–10352.

959 Retailleau, K., Duprat, F., Arhatte, M., Ranade, S.S., Peyronnet, R., Martins, J.R.,  
960 Jodar, M., Moro, C., Offermanns, S., Feng, Y., et al. (2015). Piezo1 in Smooth Muscle  
961 Cells Is Involved in Hypertension-Dependent Arterial Remodeling. *Cell Rep.* *13*, 1161–  
962 1171.

963 Ridone, P., Vassalli, M., and Martinac, B. (2019). Piezo1 mechanosensitive channels:  
964 what are they and why are they important. *Biophys. Rev.* *11*, 795–805.

965 Ridone, P., Pandzic, E., Vassalli, M., Cox, C.D., Macmillan, A., Gottlieb, P.A., and  
966 Martinac, B. (2020). Disruption of membrane cholesterol organization impairs the  
967 activity of PIEZO1 channel clusters. *J. Gen. Physiol.* 152, e201912515.

968 Rode, B., Shi, J., Endesh, N., Drinkhill, M.J., Webster, P.J., Lotteau, S.J., Bailey, M.A.,  
969 Yuldasheva, N.Y., Ludlow, M.J., Cubbon, R.M., et al. (2017). Piezo1 channels sense  
970 whole body physical activity to reset cardiovascular homeostasis and enhance  
971 performance. *Nat. Commun.* 8, 350.

972 Romero, L.O., Massey, A.E., Mata-Daboin, A.D., Sierra-Valdez, F.J., Chauhan, S.C.,  
973 Cordero-Morales, J.F., and Vásquez, V. (2019). Dietary fatty acids fine-tune Piezo1  
974 mechanical response. *Nat. Commun.* 10, 1200.

975 Romero, L.O., Caires, R., Nickolls, A.R., Chesler, A.T., Cordero-Morales, J.F., and  
976 Vasques, V. (2020). A dietary fatty acid counteracts neuronal mechanical sensitization.  
977 *Nat. Commun.* 2997.

978 Shibata, T., Ohto, U., Nomura, S., Kibata, K., Motoi, Y., Zhang, Y., Murakami, Y., Fukui,  
979 R., Ishimoto, T., Sano, S., et al. (2016). Guanosine and its modified derivatives are  
980 endogenous ligands for TLR7. *Int. Immunol.* 28, 211–222.

981 Solis, A.G., Bielecki, P., Steach, H.R., Sharma, L., Harman, C.C.D., Yun, S., de Zoete,  
982 M.R., Warnock, J.N., To, S.D.F., York, A.G., et al. (2019). Mechanosensation of cyclical  
983 force by PIEZO1 is essential for innate immunity. *Nature* 573, 69–74.

984 Sugimoto, A., Miyazaki, A., Kawarabayashi, K., Shono, M., Akazawa, Y., Hasegawa, T.,  
985 Ueda-Yamaguchi, K., Kitamura, T., Yoshizaki, K., Fukumoto, S., et al. (2017). Piezo  
986 type mechanosensitive ion channel component 1 functions as a regulator of the cell fate  
987 determination of mesenchymal stem cells. *Sci. Rep.* 7, 17696.



988 Sugisawa, E., Takayama, Y., Takemura, N., Sunagawa, M., Sugisawa, E., Takayama,  
989 Y., Takemura, N., Kondo, T., and Hatakeyama, S. (2020). RNA Sensing by Gut Piezo1  
990 Is Essential for Systemic Serotonin Synthesis. *Cell* 182, 609–624.

991 Sun, W., Chi, S., Li, Y., Ling, S., Tan, Y., Xu, Y., Jiang, F., Li, J., Liu, C., Zhong, G., et  
992 al. (2019). The mechanosensitive Piezo1 channel is required for bone formation. *Elife* 8,  
993 e47454.

994 Syeda, R. (2021). Physiology and Pathophysiology of Mechanically Activated PIEZO  
995 Channels. *Annu. Rev. Neurosci.* 44, 383–402.

996 Syeda, R., Xu, J., Dubin, A.E., Coste, B., Mathur, J., Huynh, T., Matzen, J., Lao, J.,  
997 Tully, D.C., Engels, I.H., et al. (2015). Chemical activation of the mechanotransduction  
998 channel Piezo1. *Elife* 4, e07369.

999 Szczot, M., Nickolls, A.R., Lam, R.M., and Chesler, A.T. (2021). The Form and Function  
1000 of PIEZO2. *Annu. Rev. Biochem.* 90, 507–534.

1001 Tseng, Q., Wang, I., Duchemin-Pelletier, E., Azioune, A., Carpi, N., Gao, J., Filhol, O.,  
1002 Piel, M., Théry, M., and Balland, M. (2011). A new micropatterning method of soft  
1003 substrates reveals that different tumorigenic signals can promote or reduce cell  
1004 contraction levels. *Lab Chip* 11, 2231–2240.

1005 Usoskin, D., Furlan, A., Islam, S., Abdo, H., Lönnerberg, P., Lou, D., Hjerling-Leffler, J.,  
1006 Haeggström, J., Kharchenko, O., Kharchenko, P. V., et al. (2015). Unbiased  
1007 classification of sensory neuron types by large-scale single-cell RNA sequencing. *Nat.*  
1008 *Neurosci.* 18, 145–153.

1009 Wang, F., Knutson, K., Alcaïno, C., Linden, D.R., Gibbons, S.J., Kashyap, P., Grover,  
1010 M., Oeckler, R., Gottlieb, P.A., Li, H.J., et al. (2017). Mechanosensitive ion channel

1011 Piezo2 is important for enterochromaffin cell response to mechanical forces. *J. Physiol.*  
1012 *595*, 79–91.

1013 Wang, L., You, X., Lotinun, S., Zhang, L., Wu, N., and Zou, W. (2020). Mechanical  
1014 sensing protein PIEZO1 regulates bone homeostasis via osteoblast-osteoclast  
1015 crosstalk. *Nat. Commun.* *11*, 282.

1016 Wang, S.P., Chennupati, R., Kaur, H., Iring, A., Wettschureck, N., and Offermanns, S.  
1017 (2016). Endothelial cation channel PIEZO1 controls blood pressure by mediating flow-  
1018 induced ATP release. *J. Clin. Invest.* *126*, 4527–4536.

1019 Wang, Y., Chi, S., Guo, H., Li, G., Wang, L., Zhao, Q., Rao, Y., Zu, L., He, W., and  
1020 Xiao, B. (2018). A lever-like transduction pathway for long-distance chemical- and  
1021 mechano-gating of the mechanosensitive Piezo1 channel. *Nat. Commun.* *9*, 1300.

1022 Woo, S.H., Ranade, S., Weyer, A.D., Dubin, A.E., Baba, Y., Qiu, Z., Petrus, M.,  
1023 Miyamoto, T., Reddy, K., Lumpkin, E.A., et al. (2014). Piezo2 is required for Merkel-cell  
1024 mechanotransduction. *Nature* *509*, 622–626.

1025 Woo, S.H., Lukacs, V., Nooij, J.C. de, Zaytseva, D., Criddle, C.R., Francisco, A.,  
1026 Jessell, T.M., Wilkinson, K.A., and Patapoutian, A. (2015). Piezo2 is the principal  
1027 mechanotransduction channel for proprioception. *Nat. Neurosci.* *18*, 1756–1762.

1028 Zhang, Z., Ohto, U., Shibata, T., Taoka, M., Yamauchi, Y., Sato, R., Shukla, N.M.,  
1029 David, S.A., Isobe, T., Miyake, K., et al. (2018). Structural Analyses of Toll-like Receptor  
1030 7 Reveal Detailed RNA Sequence Specificity and Recognition Mechanism of Agonistic  
1031 Ligands. *Cell Rep.* *25*, 3371–3381.

1032 Zhao, Q., Zhou, H., Li, X., and Xiao, B. (2019). The mechanosensitive Piezo1 channel:  
1033 a three-bladed propeller-like structure and a lever-like mechanogating mechanism.

1034 FEBS J. 286, 2461–2470.

1035 Zhou, T., Gao, B., Fan, Y., Liu, Y., Feng, S., Cong, Q., Zhang, X., Zhou, Y., Yadav,

1036 P.S., Lin, J., et al. (2020). Piezo1/2 mediate mechanotransduction essential for bone

1037 formation through concerted activation of NFAT-YAP1- $\beta$ -catenin. *Elife* 9, e52779.

1038

1039
